# Supplementary material
Source: PubMed Central journal article supplement (PMC4565129)
Supplement: ol5b00241_si_002.pdf [file ol5b00241_si_002.pdf]

**Supporting Information for:**

**Nickel-Catalyzed Decarboxylative Cross-Coupling of Perfluorobenzoates with  
Aryl Halides and Sulfonates**

Logan W. Sardzinski, William C. Wertjes, Abigail M. Schnaith, and Dipannita  
Kalyani\*

*St Olaf College, Department of Chemistry, 1520 St. Olaf Avenue, Northfield, MN 55057*  
Email:kalyani@stolaf.edu

<sup>1</sup>H NMR and <sup>13</sup>C NMR spectra

DK-XXV-LS-13-PureHIVAC

user: sa...  
team: research-kalyani-sardzins holder: 15  
solvent: CDCl3 expt: PROTON NS=16;SW=20;  
standard 1H experiment ()

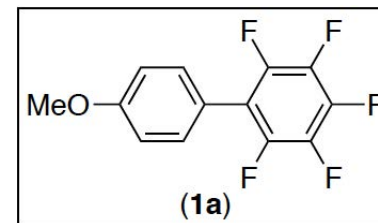

Current Data Parameters  
NAME Jul31-2014  
EXPNO 1913810  
PROCNO 1

F2 - Acquisition Parameters  
Date\_ 20140731  
Time 21.30  
INSTRUM spect  
PROBHD 5 mm BBO 1H/13  
PULPROG zg30  
TD 65536  
SOLVENT CDCl3  
NS 16  
DS 2  
SWH 8012.820 Hz  
FIDRES 0.122266 Hz  
AQ 4.0894966 sec  
RG 724.1  
DW 62.400 usec  
DE 6.00 usec  
TE 300.0 K  
D1 1.00000000 sec

==== CHANNEL f1 =====  
NUC1 1H  
P1 11.75 usec  
PL1 -4.00 dB  
SFO1 400.1324710 MHz

F2 - Processing parameters  
SI 32768  
SF 400.1300000 MHz  
WDW EM  
SSB 0  
LB 0.30 Hz  
GB 0  
PC 1.00

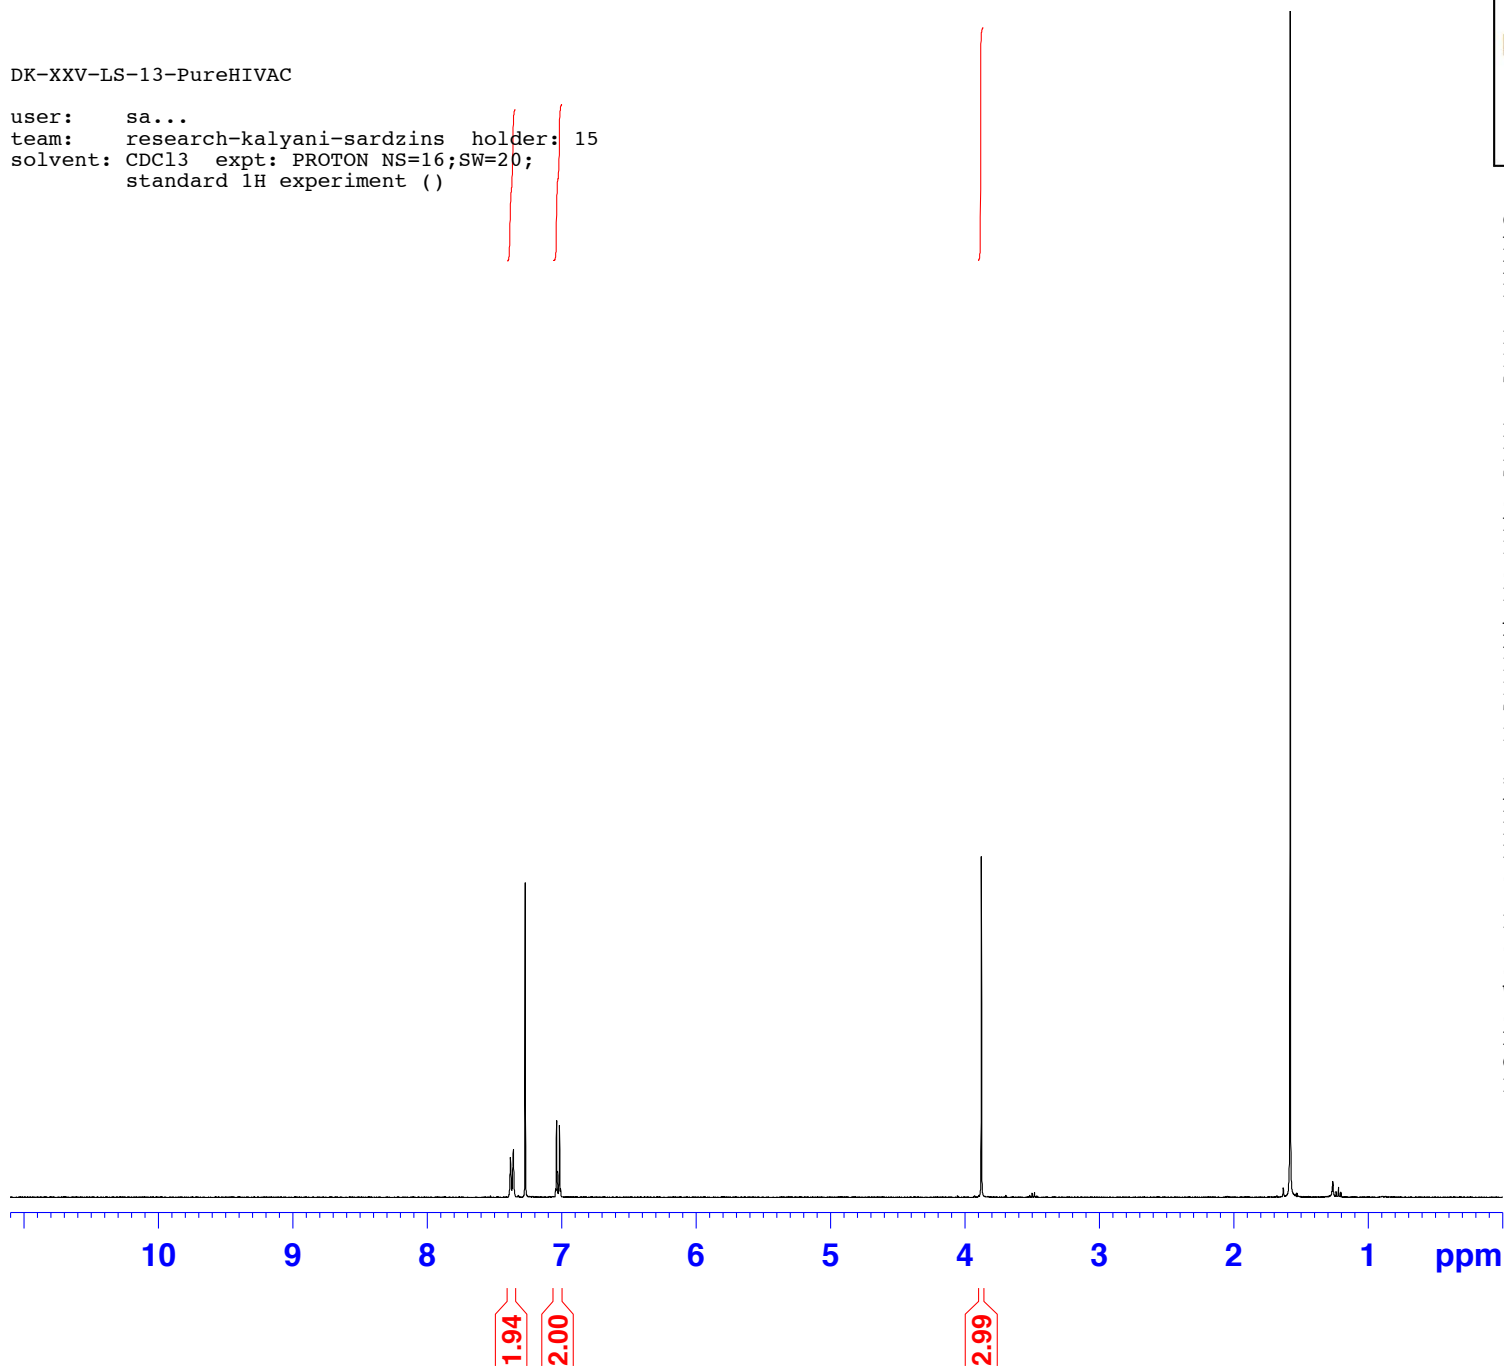

DK-XIX-LS-126-FR24-65

user: sa...  
team: research-kalyani-sardzins holder: 8  
solvent: CDCl3 expt: PROTON NS=16;SW=20;  
standard 1H experiment ()

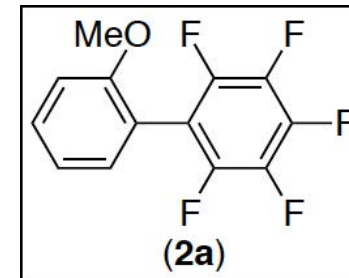

Current Data Parameters  
NAME Jul28-2014  
EXPNO 1905810  
PROCNO 1

F2 - Acquisition Parameters  
Date\_ 20140728  
Time 19.28  
INSTRUM spect  
PROBHD 5 mm BBO 1H/13  
PULPROG zg30  
TD 65536  
SOLVENT CDCl3  
NS 16  
DS 2  
SWH 8012.820 Hz  
FIDRES 0.122266 Hz  
AQ 4.0894966 sec  
RG 724.1  
DW 62.400 usec  
DE 6.00 usec  
TE 300.0 K  
D1 1.00000000 sec

==== CHANNEL f1 =====  
NUC1 1H  
P1 11.75 usec  
PL1 -4.00 dB  
SFO1 400.1324710 MHz

F2 - Processing parameters  
SI 32768  
SF 400.1300000 MHz  
WDW EM  
SSB 0  
LB 0.30 Hz  
GB 0  
PC 1.00

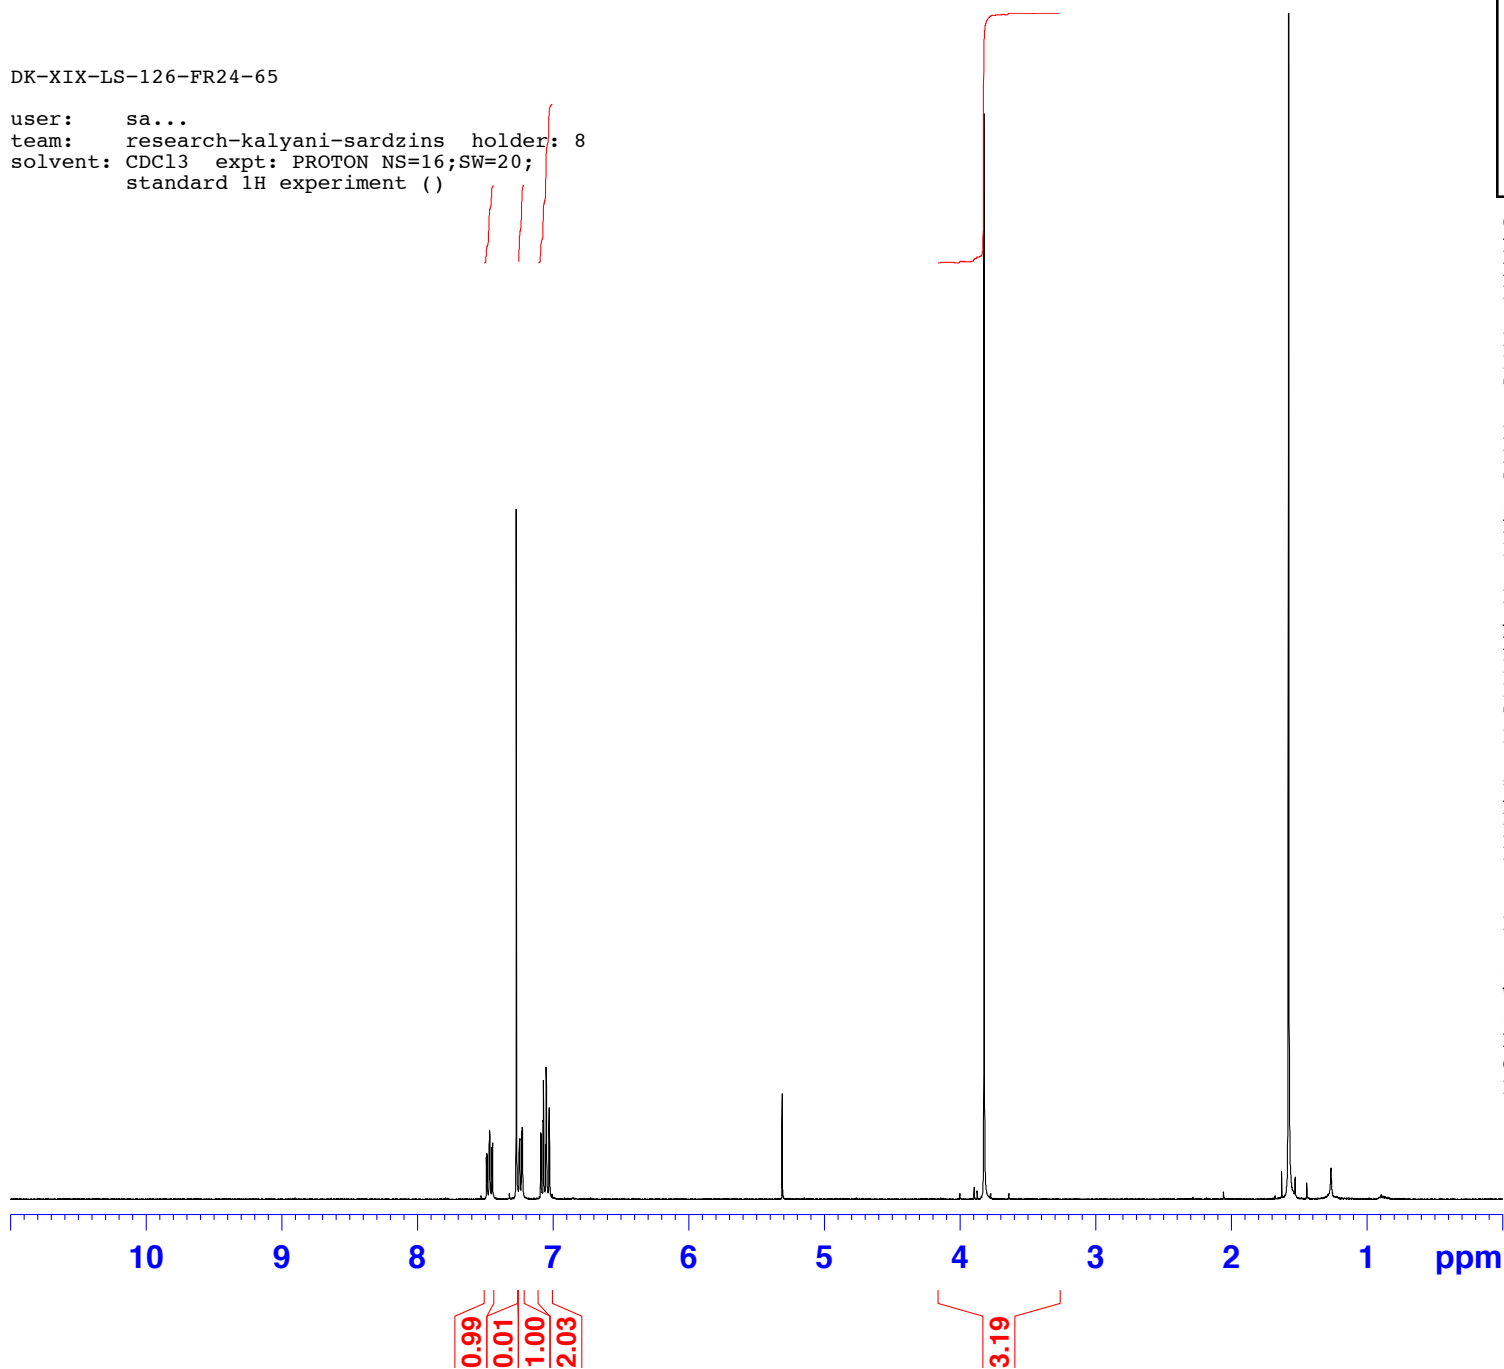

DK-XIX-LS-127-FR24-65

user: sa...  
team: research-kalyani-sardzins holder: 15  
solvent: CDCl3 expt: PROTON NS=16;SW=20;  
standard 1H experiment ()

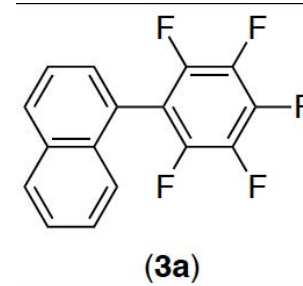

Current Data Parameters  
NAME Jul28-2014  
EXPNO 1905410  
PROCNO 1

F2 - Acquisition Parameters  
Date\_ 20140728  
Time 18.48  
INSTRUM spect  
PROBHD 5 mm BBO 1H/13  
PULPROG zg30  
TD 65536  
SOLVENT CDCl3  
NS 16  
DS 2  
SWH 8012.820 Hz  
FIDRES 0.122266 Hz  
AQ 4.0894966 sec  
RG 645.1  
DW 62.400 usec  
DE 6.00 usec  
TE 300.0 K  
D1 1.00000000 sec

==== CHANNEL f1 =====  
NUC1 1H  
P1 11.75 usec  
PL1 -4.00 dB  
SFO1 400.1324710 MHz

F2 - Processing parameters  
SI 32768  
SF 400.1300000 MHz  
WDW EM  
SSB 0  
LB 0.30 Hz  
GB 0  
PC 1.00

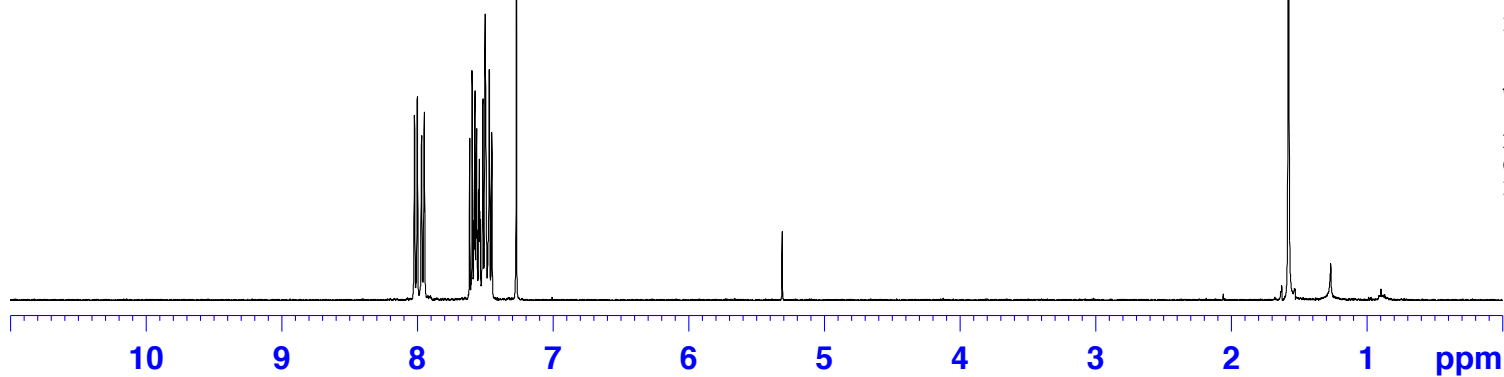

1.00  
1.01  
5.16

DK-XIX-LS-141-FR17-34

user: sa...  
team: research-kalyani-sardzins holder: 8  
solvent: CDCl3 expt: PROTON NS=16;SW=20;  
standard 1H experiment ()

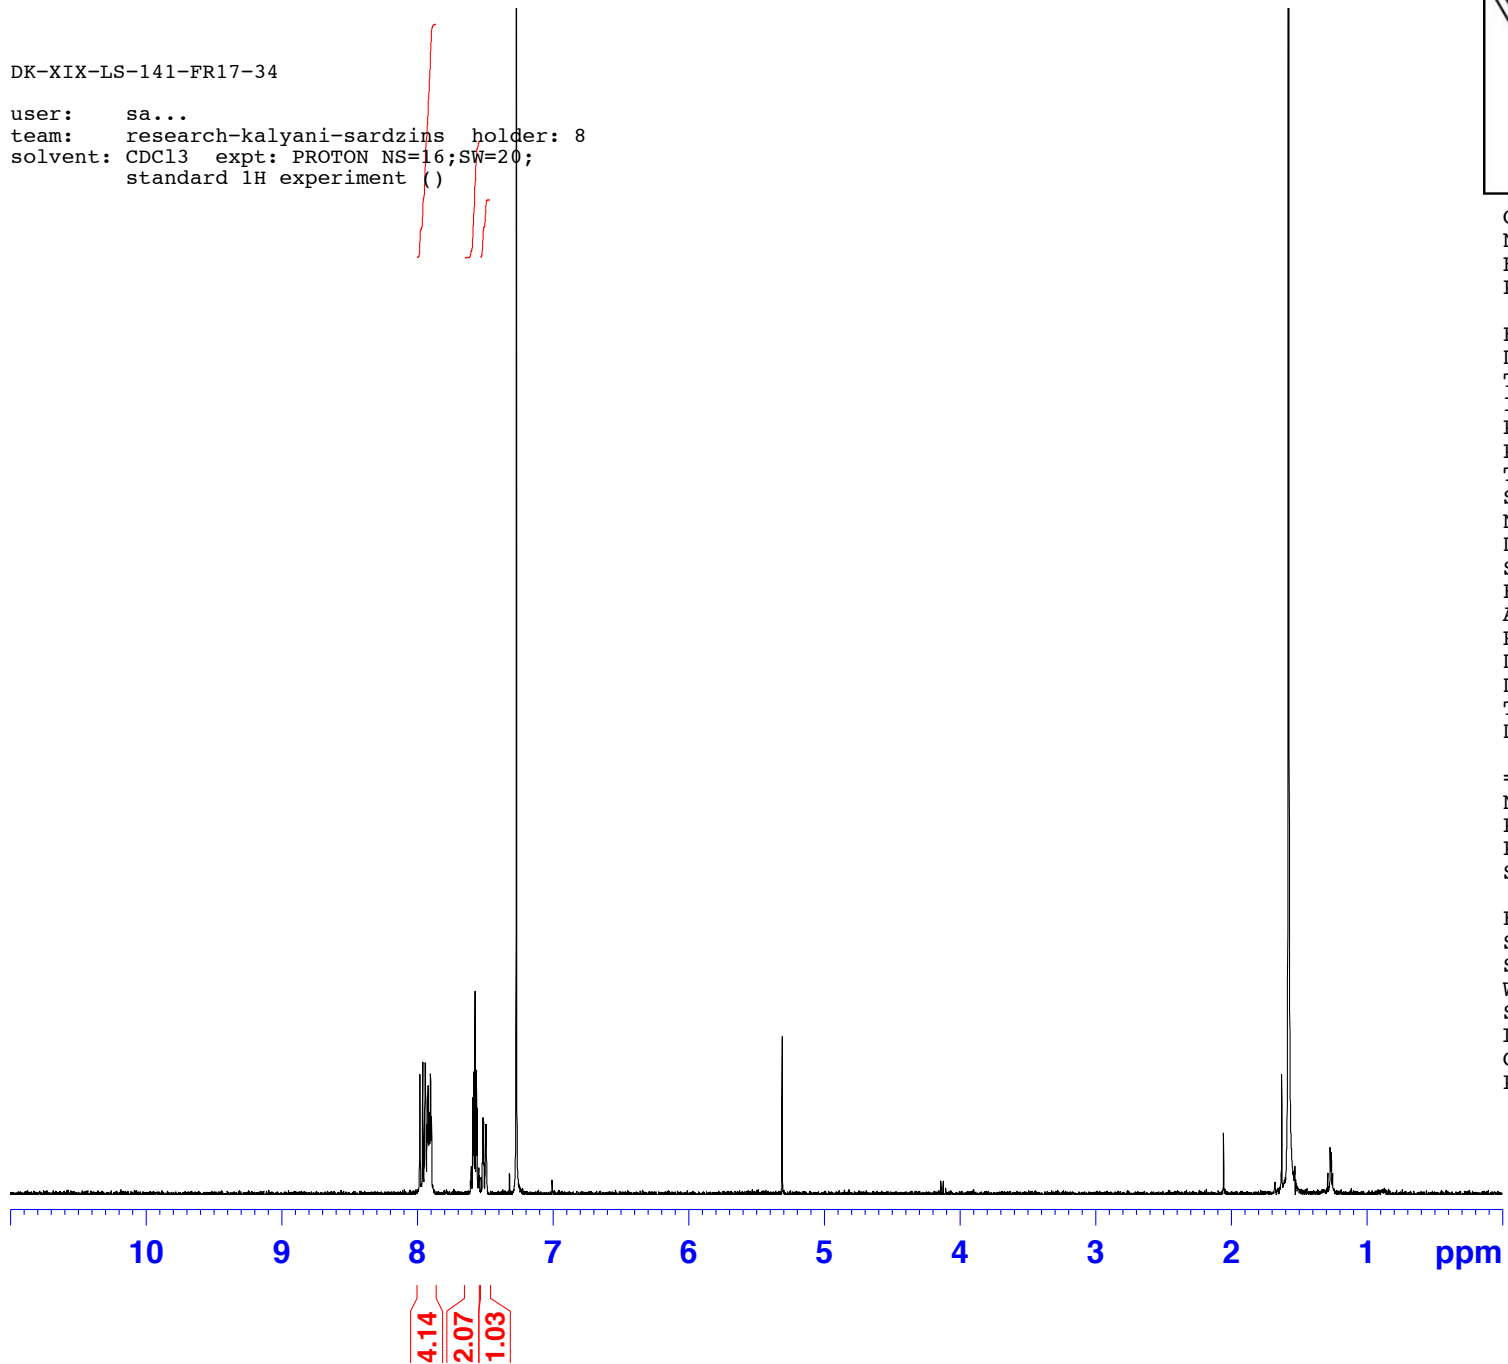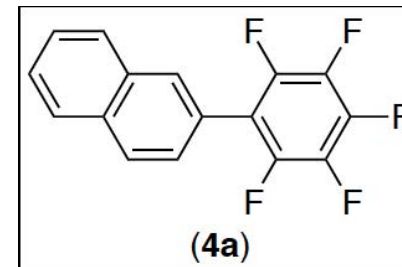

Current Data Parameters  
NAME Jul27-2014  
EXPNO 1904910  
PROCNO 1

F2 - Acquisition Parameters  
Date\_ 20140727  
Time 10.00  
INSTRUM spect  
PROBHD 5 mm BBO 1H/13  
PULPROG zg30  
TD 65536  
SOLVENT CDCl3  
NS 16  
DS 2  
SWH 8012.820 Hz  
FIDRES 0.122266 Hz  
AQ 4.0894966 sec  
RG 812.7  
DW 62.400 usec  
DE 6.00 usec  
TE 300.0 K  
D1 1.00000000 sec

===== CHANNEL f1 =====  
NUC1 1H  
P1 11.75 usec  
PL1 -4.00 dB  
SFO1 400.1324710 MHz

F2 - Processing parameters  
SI 32768  
SF 400.1300000 MHz  
WDW EM  
SSB 0  
LB 0.30 Hz  
GB 0  
PC 1.00

DK-XIX-LS-61-1

user: sa...  
team: research-kalyani-sardzins holder: 9  
solvent: CDCl3 expt: PROTON NS=16;SW=20;  
standard 1H experiment ()

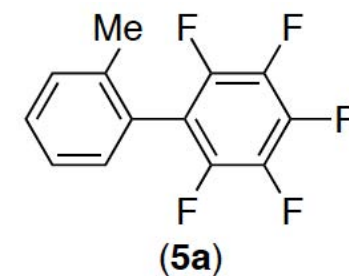

Current Data Parameters  
NAME Jun09-2014  
EXPNO 1855610  
PROCNO 1

F2 - Acquisition Parameters  
Date\_ 20140609  
Time 10.49  
INSTRUM spect  
PROBHD 5 mm BBO 1H/13  
PULPROG zg30  
TD 65536  
SOLVENT CDCl3  
NS 16  
DS 2  
SWH 8012.820 Hz  
FIDRES 0.122266 Hz  
AQ 4.0894966 sec  
RG 724.1  
DW 62.400 usec  
DE 6.00 usec  
TE 300.0 K  
D1 1.00000000 sec

==== CHANNEL f1 =====  
NUC1 1H  
P1 11.75 usec  
PL1 -4.00 dB  
SFO1 400.1324710 MHz

F2 - Processing parameters  
SI 32768  
SF 400.1300000 MHz  
WDW EM  
SSB 0  
LB 0.30 Hz  
GB 0  
PC 1.00

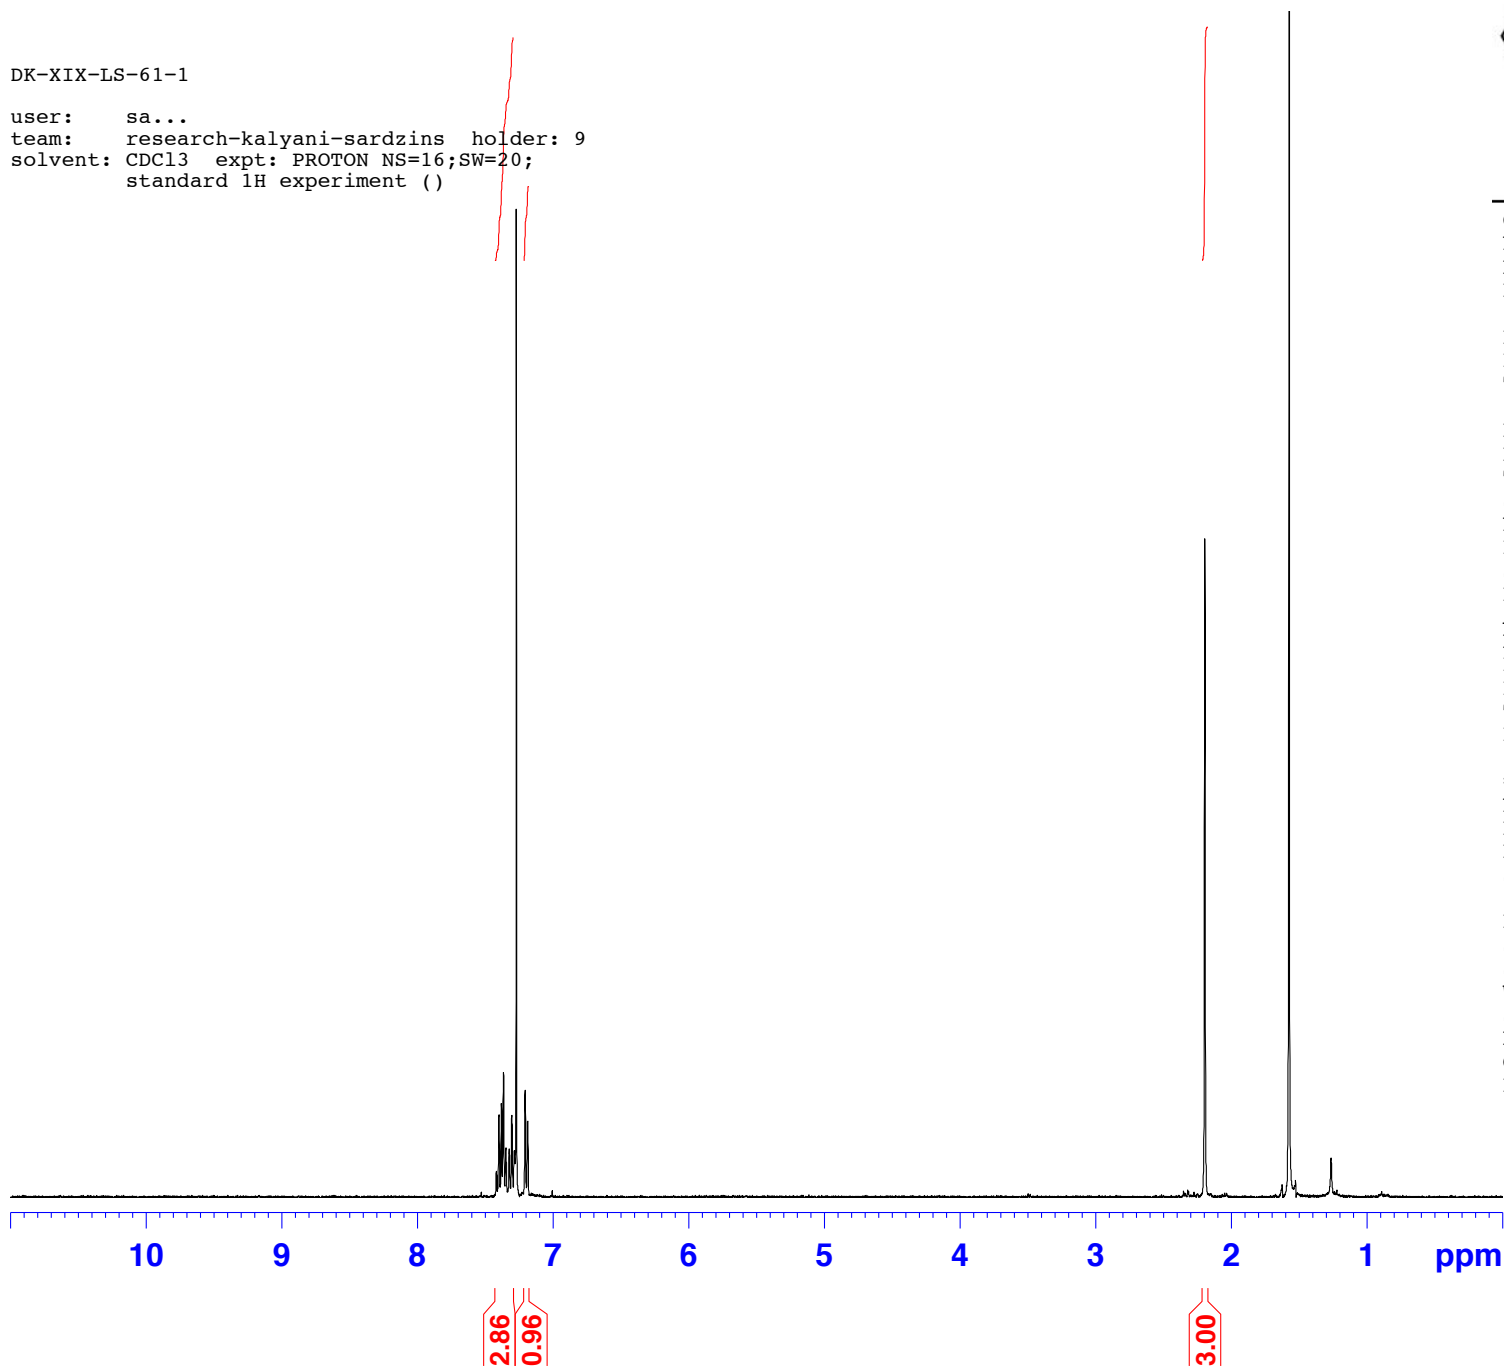

DK-XIII-WW-131-SET 2

user: we...  
team: research-kalyani holder: 12  
solvent: CDCl3 expt: PROTON NS=16;SW=20;  
standard 1H experiment ()

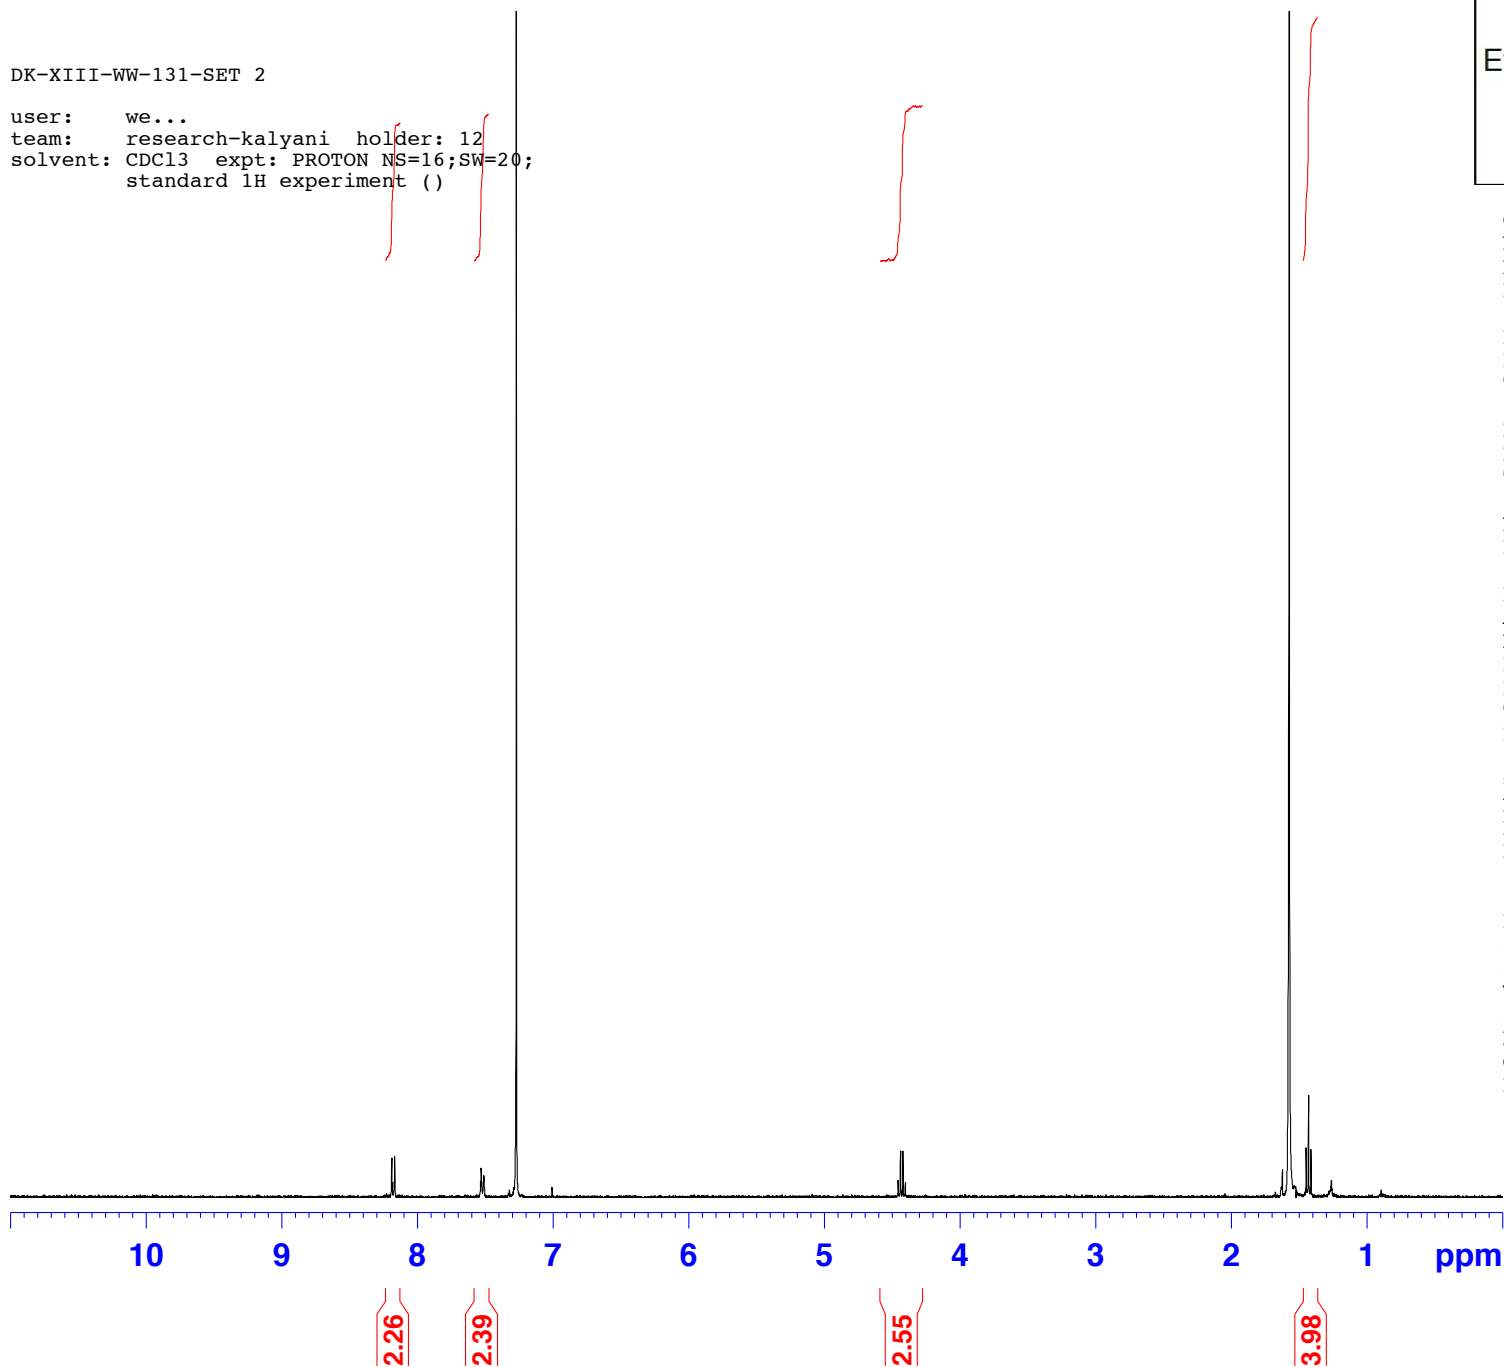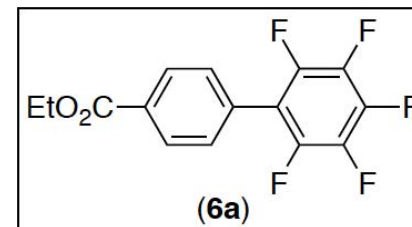

Current Data Parameters  
NAME Oct29-2014  
EXPNO 1965510  
PROCNO 1

F2 - Acquisition Parameters  
Date\_ 20141029  
Time 14.45  
INSTRUM spect  
PROBHD 5 mm BBO 1H/13  
PULPROG zg30  
TD 65536  
SOLVENT CDCl3  
NS 16  
DS 2  
SWH 8012.820 Hz  
FIDRES 0.122266 Hz  
AQ 4.0894966 sec  
RG 812.7  
DW 62.400 usec  
DE 6.00 usec  
TE 300.0 K  
D1 1.00000000 sec

==== CHANNEL f1 =====  
NUC1 1H  
P1 11.75 usec  
PL1 -4.00 dB  
SFO1 400.1324710 MHz

F2 - Processing parameters  
SI 32768  
SF 400.1300000 MHz  
WDW EM  
SSB 0  
LB 0.30 Hz  
GB 0  
PC 1.00

DK-XXV-LS-59-PUREFR

user: sa...  
team: research-kalyani-sardzins holder: 1  
solvent: CDCl3 expt: PROTON NS=128;SW=20;  
standard 1H experiment ()

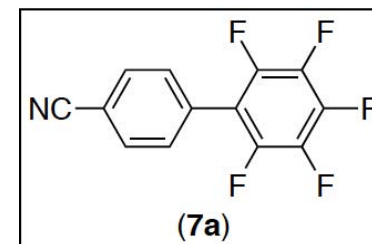

Current Data Parameters  
NAME Dec14-2014  
EXPNO 1024710  
PROCNO 1

F2 - Acquisition Parameters  
Date\_ 20141214  
Time 18.00  
INSTRUM spect  
PROBHD 5 mm BBO 1H/13  
PULPROG zg30  
TD 65536  
SOLVENT CDCl3  
NS 128  
DS 2  
SWH 8012.820 Hz  
FIDRES 0.122266 Hz  
AQ 4.0894966 sec  
RG 912.3  
DW 62.400 usec  
DE 6.00 usec  
TE 300.0 K  
D1 1.00000000 sec

==== CHANNEL f1 =====  
NUC1 1H  
P1 11.75 usec  
PL1 -4.00 dB  
SFO1 400.1324710 MHz

F2 - Processing parameters  
SI 32768  
SF 400.1300000 MHz  
WDW EM  
SSB 0  
LB 0.30 Hz  
GB 0  
PC 1.00

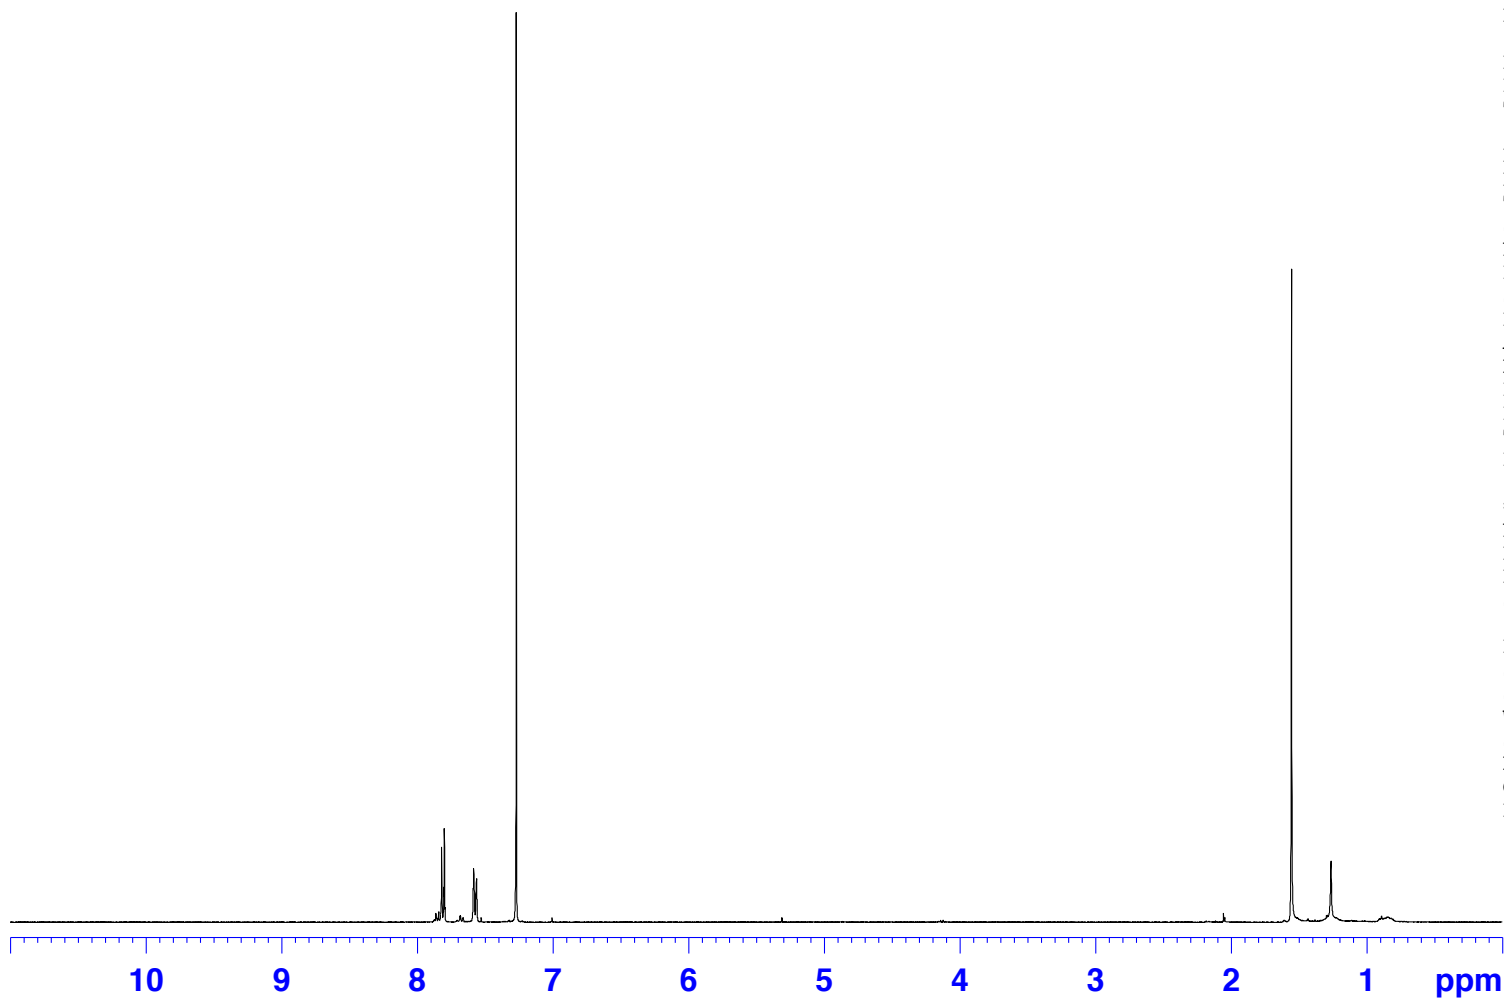

2.03  
2.10



DK-XXVII-WW-45

user: we...  
team: research-kalyani holder: 14  
solvent: CDCl3 expt: PROTON NS=16;SW=20;  
standard 1H experiment ()

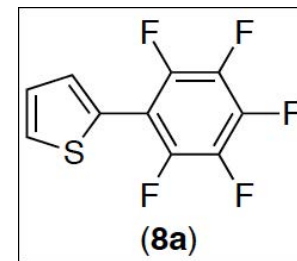

Current Data Parameters  
NAME Jan10-2015  
EXPNO 1029310  
PROCNO 1

F2 - Acquisition Parameters  
Date\_ 20150110  
Time 17.18  
INSTRUM spect  
PROBHD 5 mm BBO 1H/13  
PULPROG zg30  
TD 65536  
SOLVENT CDCl3  
NS 16  
DS 2  
SWH 8012.820 Hz  
FIDRES 0.122266 Hz  
AQ 4.0894966 sec  
RG 812.7  
DW 62.400 usec  
DE 6.00 usec  
TE 300.0 K  
D1 1.00000000 sec

==== CHANNEL f1 =====  
NUC1 1H  
P1 11.75 usec  
PL1 -4.00 dB  
SFO1 400.1324710 MHz

F2 - Processing parameters  
SI 32768  
SF 400.1300000 MHz  
WDW EM  
SSB 0  
LB 0.30 Hz  
GB 0  
PC 1.00

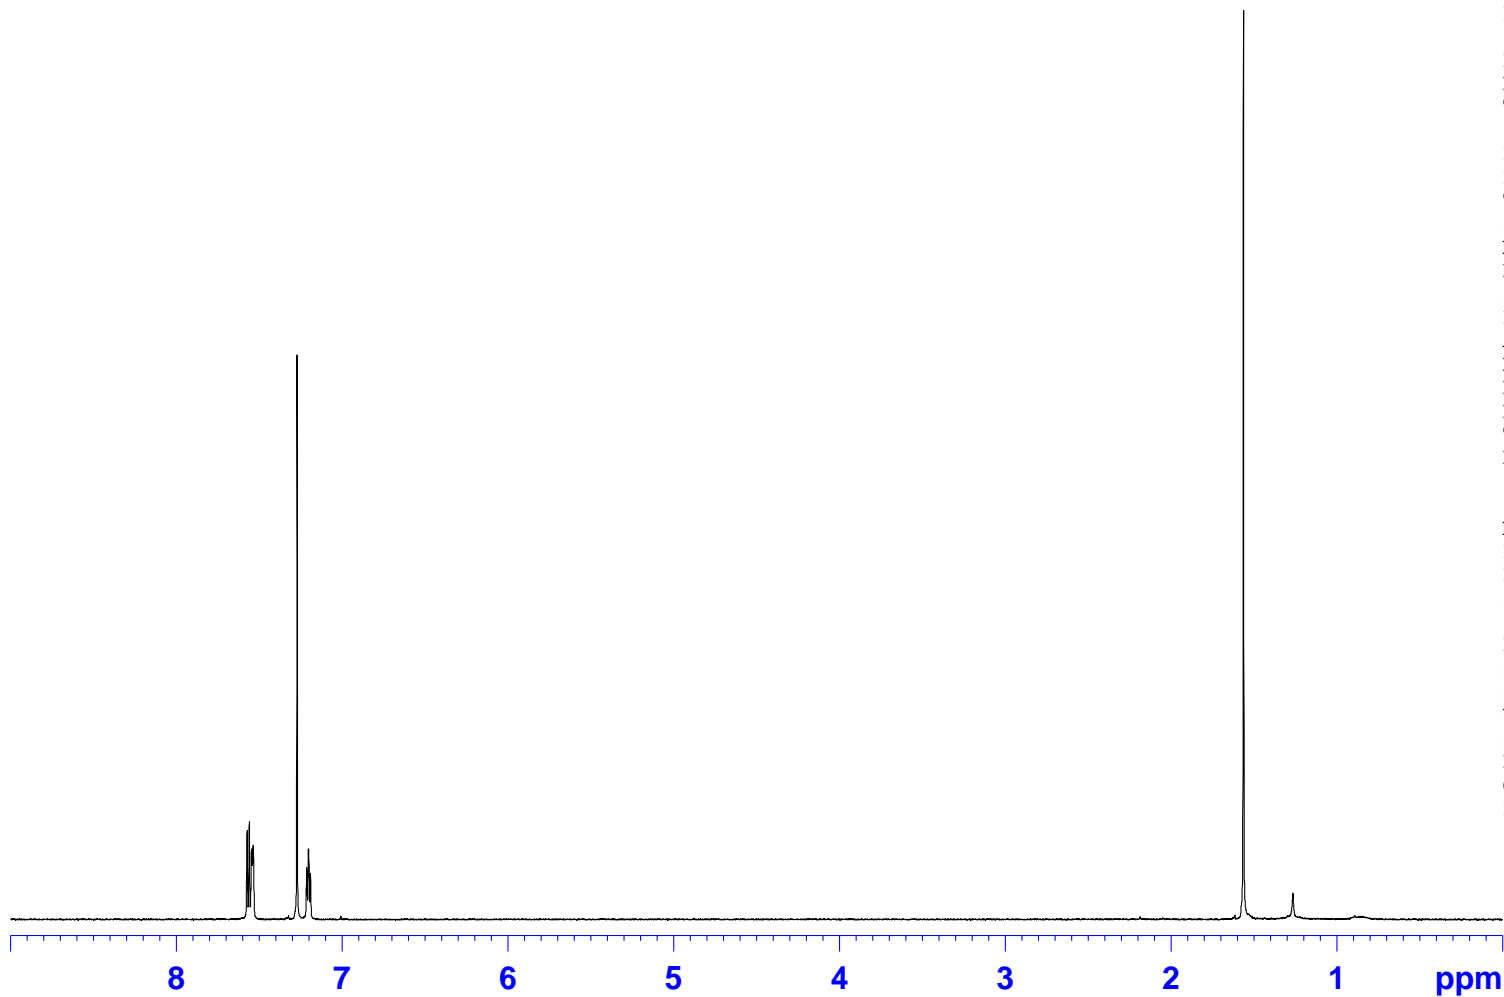

1.98  
1.00

DK-XIII-WW-145 C.3

user: we...  
team: research-kalyani holder: 4  
solvent: CDCl3 expt: PROTON NS=16;SW=20;  
standard 1H experiment ()

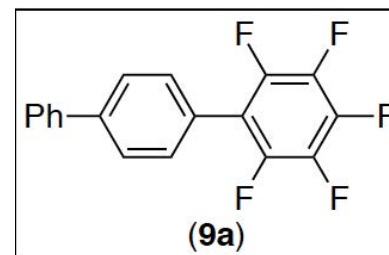

Current Data Parameters  
NAME Nov12-2014  
EXPNO 1999910  
PROCNO 1

F2 - Acquisition Parameters  
Date\_ 20141112  
Time 15.49  
INSTRUM spect  
PROBHD 5 mm BBO 1H/13  
PULPROG zg30  
TD 65536  
SOLVENT CDCl3  
NS 16  
DS 2  
SWH 8012.820 Hz  
FIDRES 0.122266 Hz  
AQ 4.0894966 sec  
RG 812.7  
DW 62.400 usec  
DE 6.00 usec  
TE 300.0 K  
D1 1.00000000 sec

==== CHANNEL f1 =====  
NUC1 1H  
P1 11.75 usec  
PL1 -4.00 dB  
SFO1 400.1324710 MHz

F2 - Processing parameters  
SI 32768  
SF 400.1300000 MHz  
WDW EM  
SSB 0  
LB 0.30 Hz  
GB 0  
PC 1.00

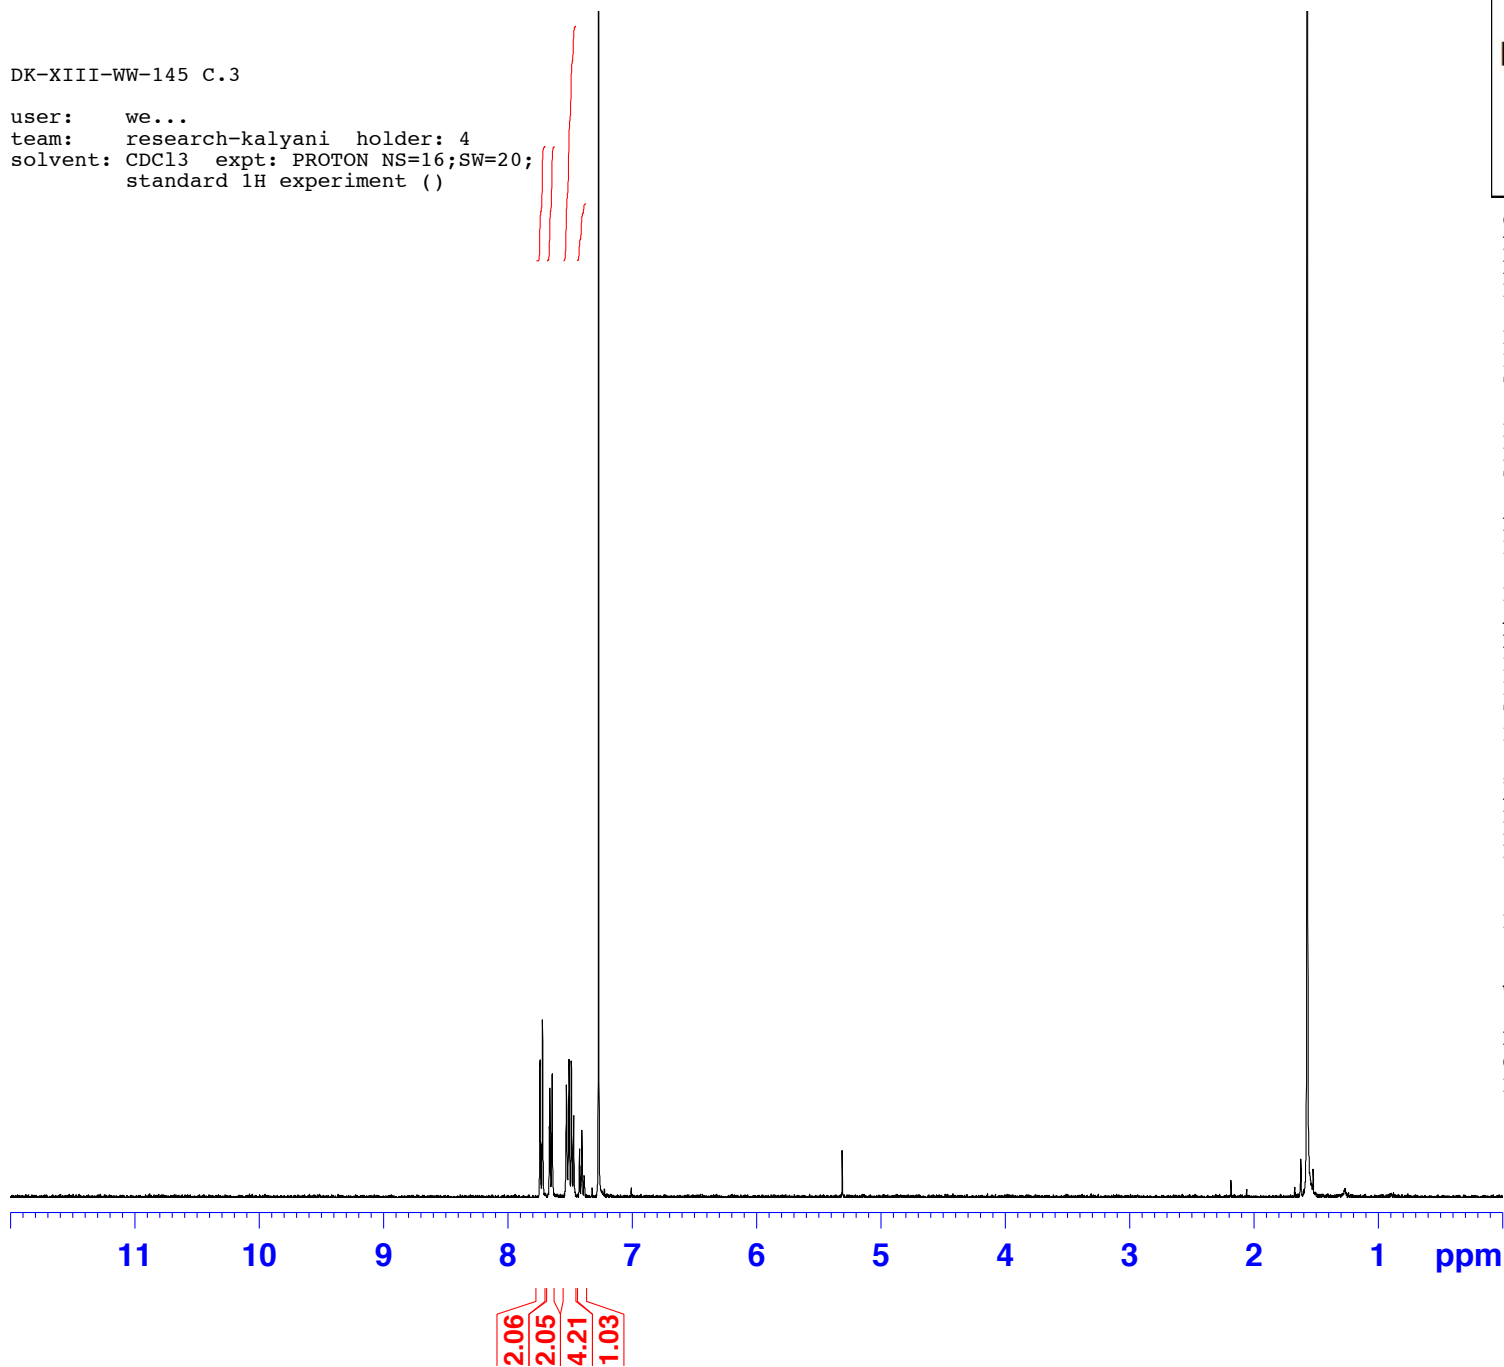

DK-XIII-WW-143 FR. 16-18

user: we...  
team: research-kalyani holder: 11  
solvent: CDCl3 expt: PROTON NS=16;SW=20;  
standard 1H experiment ()

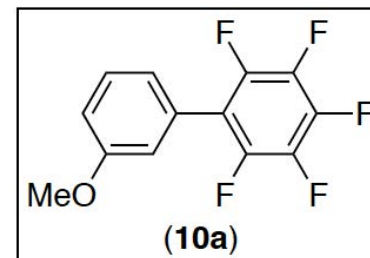

Current Data Parameters  
NAME Nov22-2014  
EXPNO 1013610  
PROCNO 1

F2 - Acquisition Parameters  
Date\_ 20141122  
Time 16.48  
INSTRUM spect  
PROBHD 5 mm BBO 1H/13  
PULPROG zg30  
TD 65536  
SOLVENT CDCl3  
NS 16  
DS 2  
SWH 8012.820 Hz  
FIDRES 0.122266 Hz  
AQ 4.0894966 sec  
RG 724.1  
DW 62.400 usec  
DE 6.00 usec  
TE 300.0 K  
D1 1.00000000 sec

==== CHANNEL f1 =====  
NUC1 1H  
P1 11.75 usec  
PL1 -4.00 dB  
SFO1 400.1324710 MHz

F2 - Processing parameters  
SI 32768  
SF 400.1300000 MHz  
WDW EM  
SSB 0  
LB 0.30 Hz  
GB 0  
PC 1.00

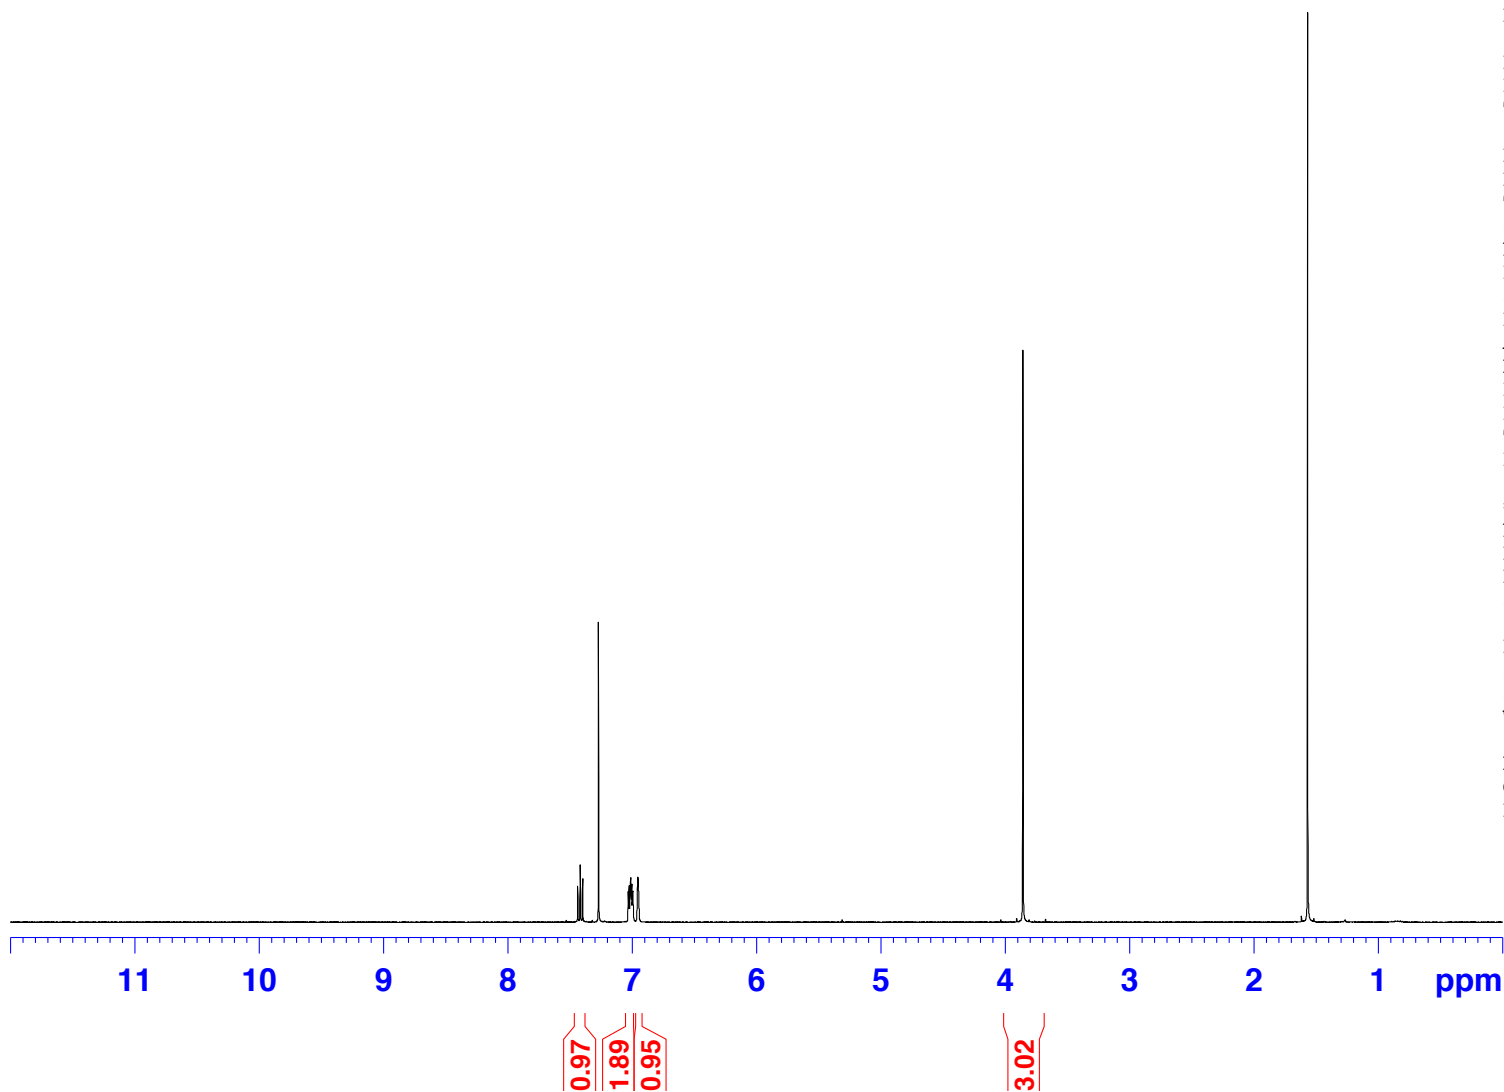

DK-XXVII-WW-31-FR.47-61

user: we...  
team: research-kalyani holder: 6  
solvent: CDCl3 expt: PROTON NS=16;SW=20;  
standard 1H experiment ()

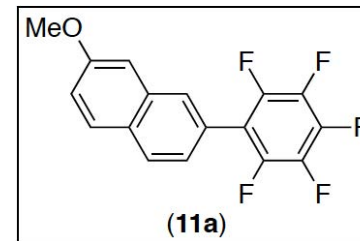

Current Data Parameters  
NAME Dec11-2014  
EXPNO 1022910  
PROCNO 1

F2 - Acquisition Parameters  
Date\_ 20141211  
Time 11.46  
INSTRUM spect  
PROBHD 5 mm BBO 1H/13  
PULPROG zg30  
TD 65536  
SOLVENT CDCl3  
NS 16  
DS 2  
SWH 8012.820 Hz  
FIDRES 0.122266 Hz  
AQ 4.0894966 sec  
RG 812.7  
DW 62.400 usec  
DE 6.00 usec  
TE 300.0 K  
D1 1.00000000 sec

==== CHANNEL f1 =====  
NUC1 1H  
P1 11.75 usec  
PL1 -4.00 dB  
SFO1 400.1324710 MHz

F2 - Processing parameters  
SI 32768  
SF 400.1300000 MHz  
WDW EM  
SSB 0  
LB 0.30 Hz  
GB 0  
PC 1.00

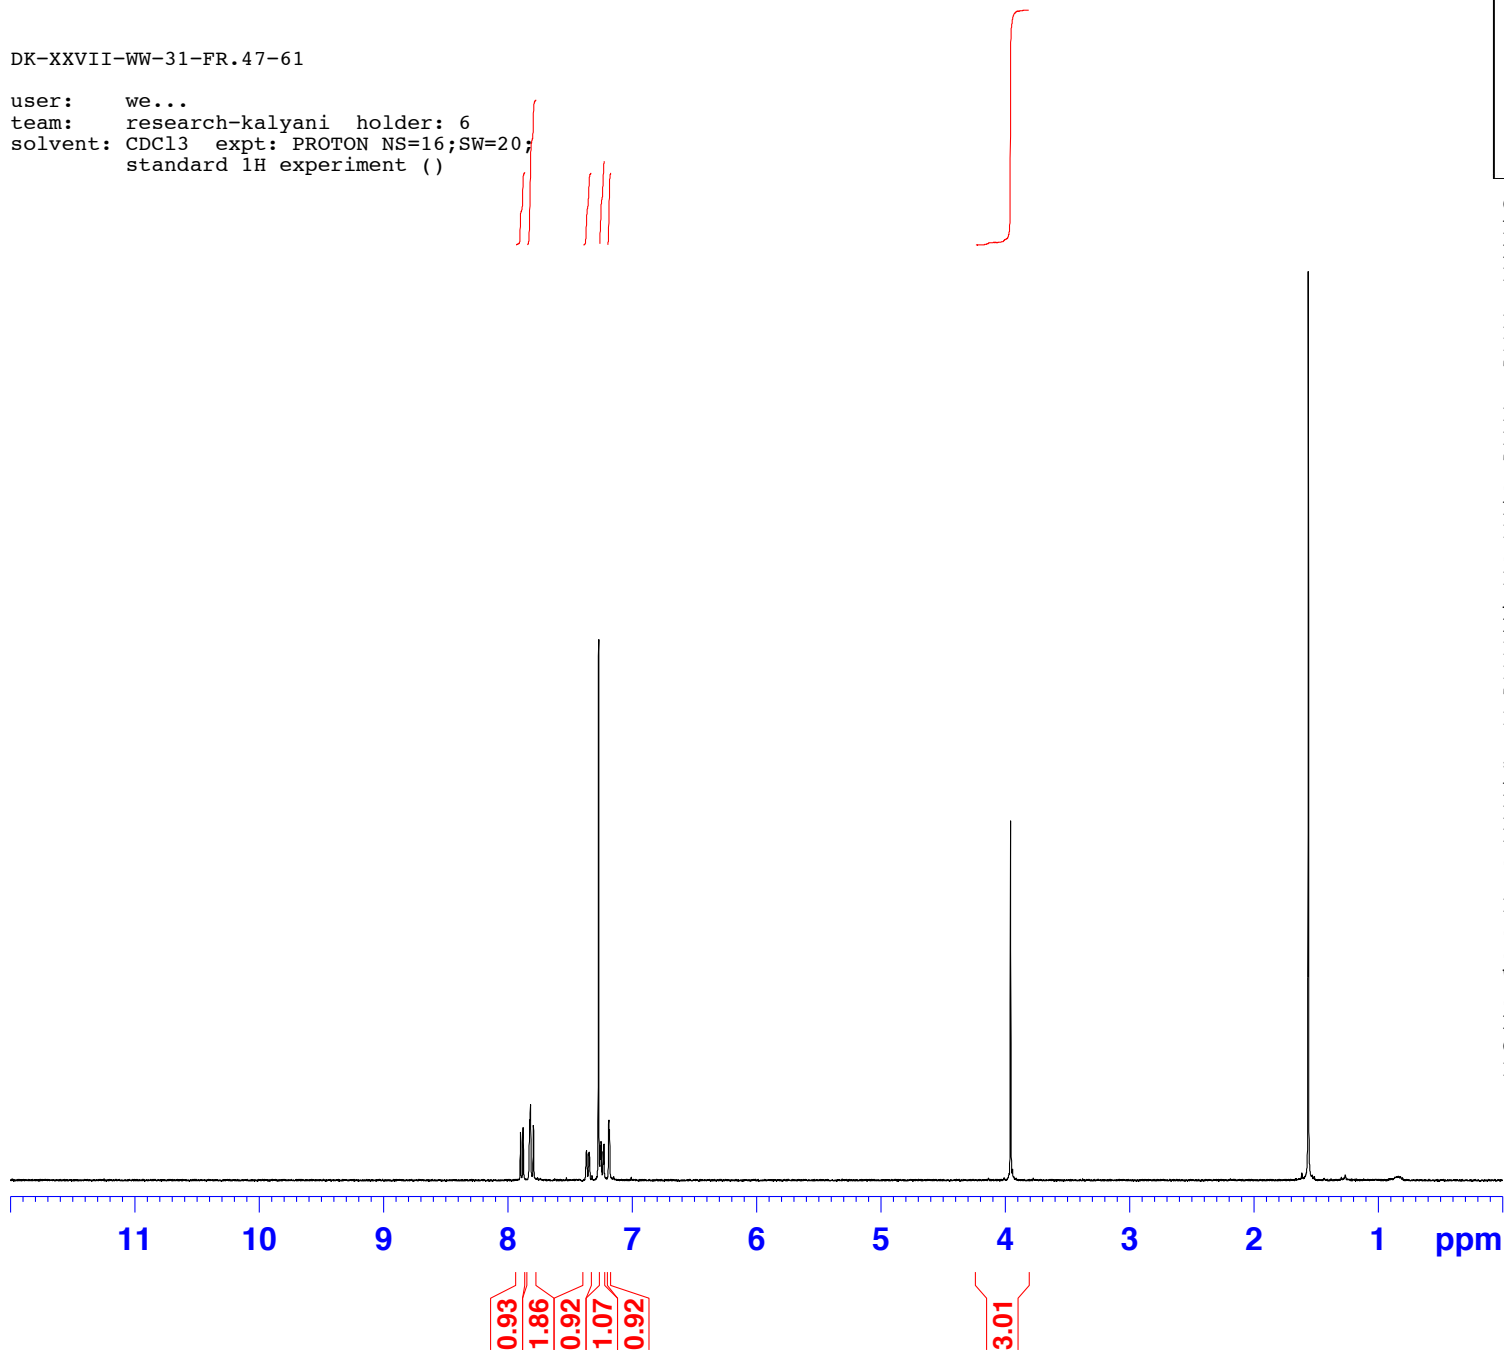

DK-XXVII-WW-31-1 C13

user: ka...  
team: research-kalyani holder: 14  
solvent: CDCl3 expt: C13CPD32 NS=8192;D1=2;  
standard C13 experiment ()

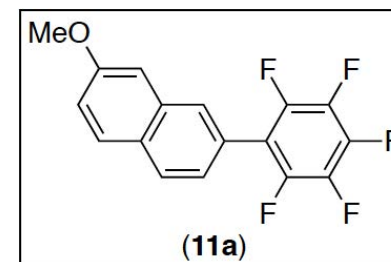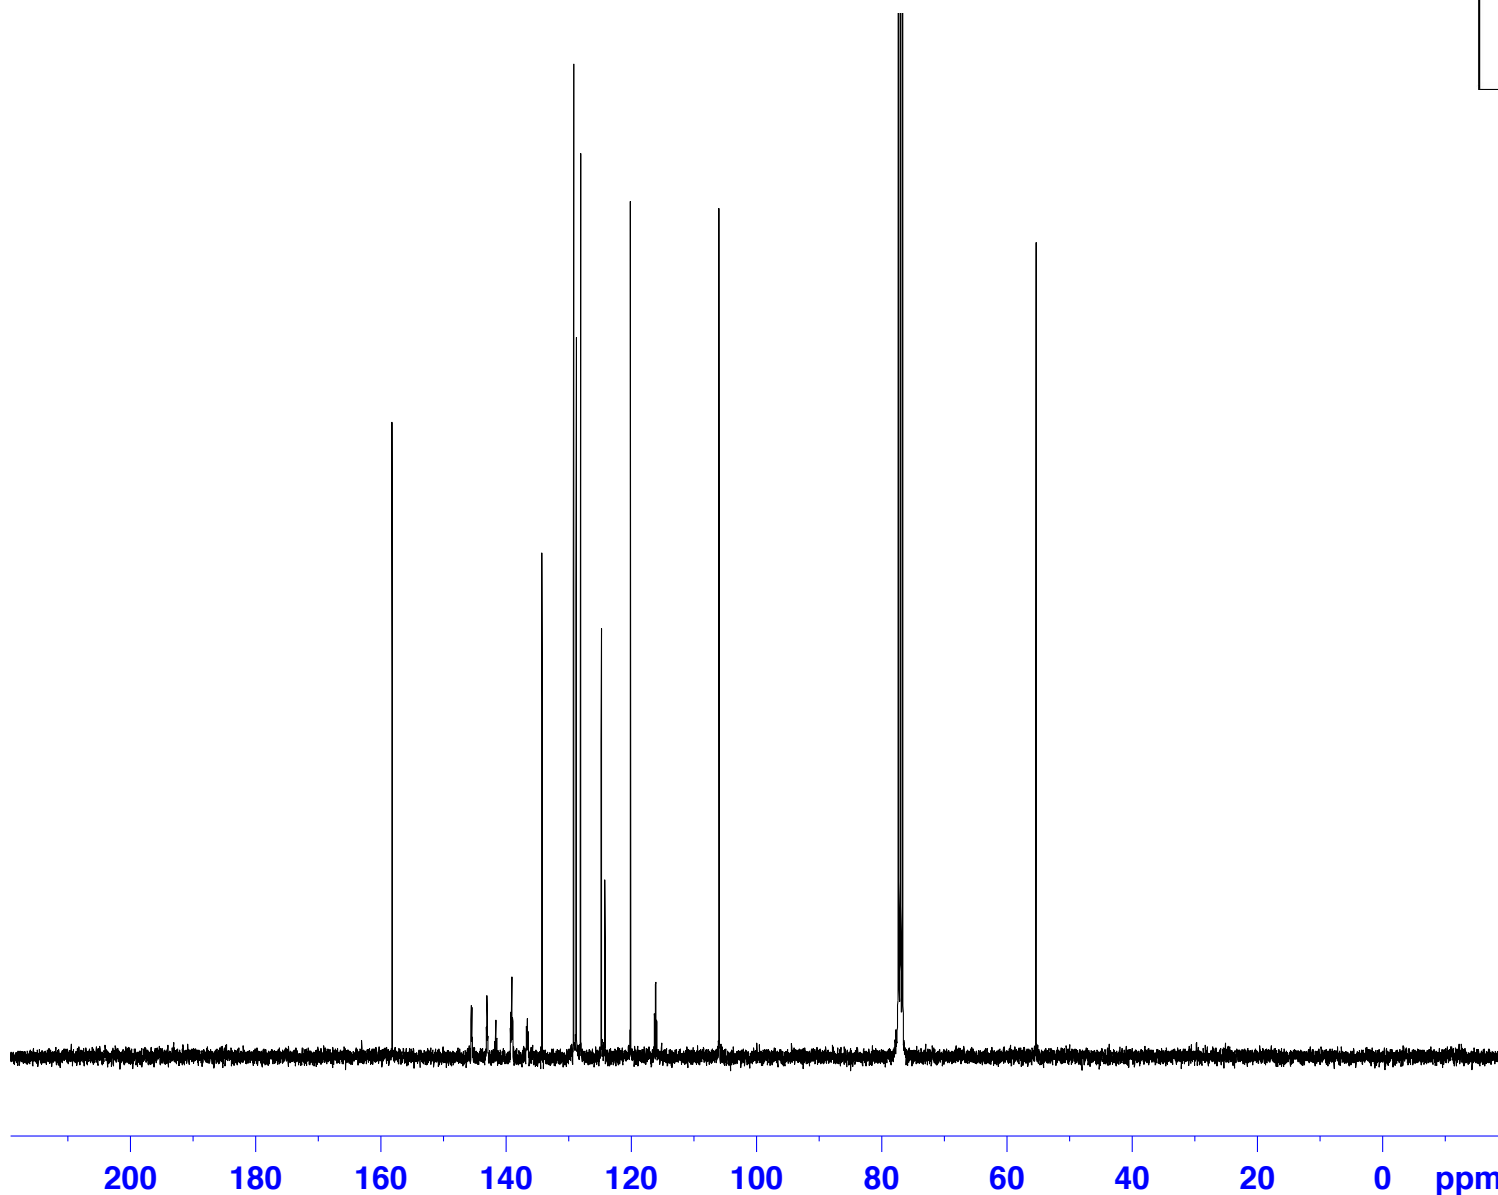

Current Data Parameters  
NAME Dec28-2014  
EXPNO 1027410  
PROCNO 1

F2 - Acquisition Parameters  
Date\_ 20141228  
Time 20.27  
INSTRUM spect  
PROBHD 5 mm BBO 1H/13  
PULPROG zgpg30  
TD 65536  
SOLVENT CDCl3  
NS 8192  
DS 2  
SWH 23980.814 Hz  
FIDRES 0.365918 Hz  
AQ 1.3664756 sec  
RG 6502  
DW 20.850 usec  
DE 6.00 usec  
TE 300.0 K  
D1 2.00000000 sec  
d11 0.03000000 sec  
d12 0.00002000 sec

==== CHANNEL f1 =====  
NUC1 13C  
P1 9.00 usec  
PL1 -4.50 dB  
SFO1 100.6228298 MHz

==== CHANNEL f2 =====  
CPDPRG2 waltz16  
NUC2 1H  
PCPD2 90.00 usec  
PL2 -4.00 dB  
PL12 13.68 dB  
PL13 17.24 dB  
SFO2 400.1316005 MHz

F2 - Processing parameters  
SI 32768  
SF 100.6127690 MHz  
WDW EM

DK-XXVII-WW-47

user: we...  
team: research-kalyani holder: 1  
solvent: CDCl3 expt: PROTON NS=16;SW=20;  
standard 1H experiment ()

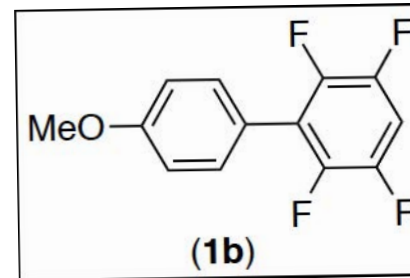

Current Data Parameters  
NAME Jan21-2015  
EXPNO 1036710  
PROCNO 1

F2 - Acquisition Parameters  
Date\_ 20150121  
Time 9.37  
INSTRUM spect  
PROBHD 5 mm BBO 1H/13  
PULPROG zg30  
TD 65536  
SOLVENT CDCl3  
NS 16  
DS 2  
SWH 8012.820 Hz  
FIDRES 0.122266 Hz  
AQ 4.0894966 sec  
RG 812.7  
DW 62.400 usec  
DE 6.00 usec  
TE 300.0 K  
D1 1.00000000 sec

==== CHANNEL f1 =====  
NUC1 1H  
P1 11.75 usec  
PL1 -4.00 dB  
SFO1 400.1324710 MHz

F2 - Processing parameters  
SI 32768  
SF 400.1300000 MHz  
WDW EM  
SSB 0  
LB 0.30 Hz  
GB 0  
PC 1.00

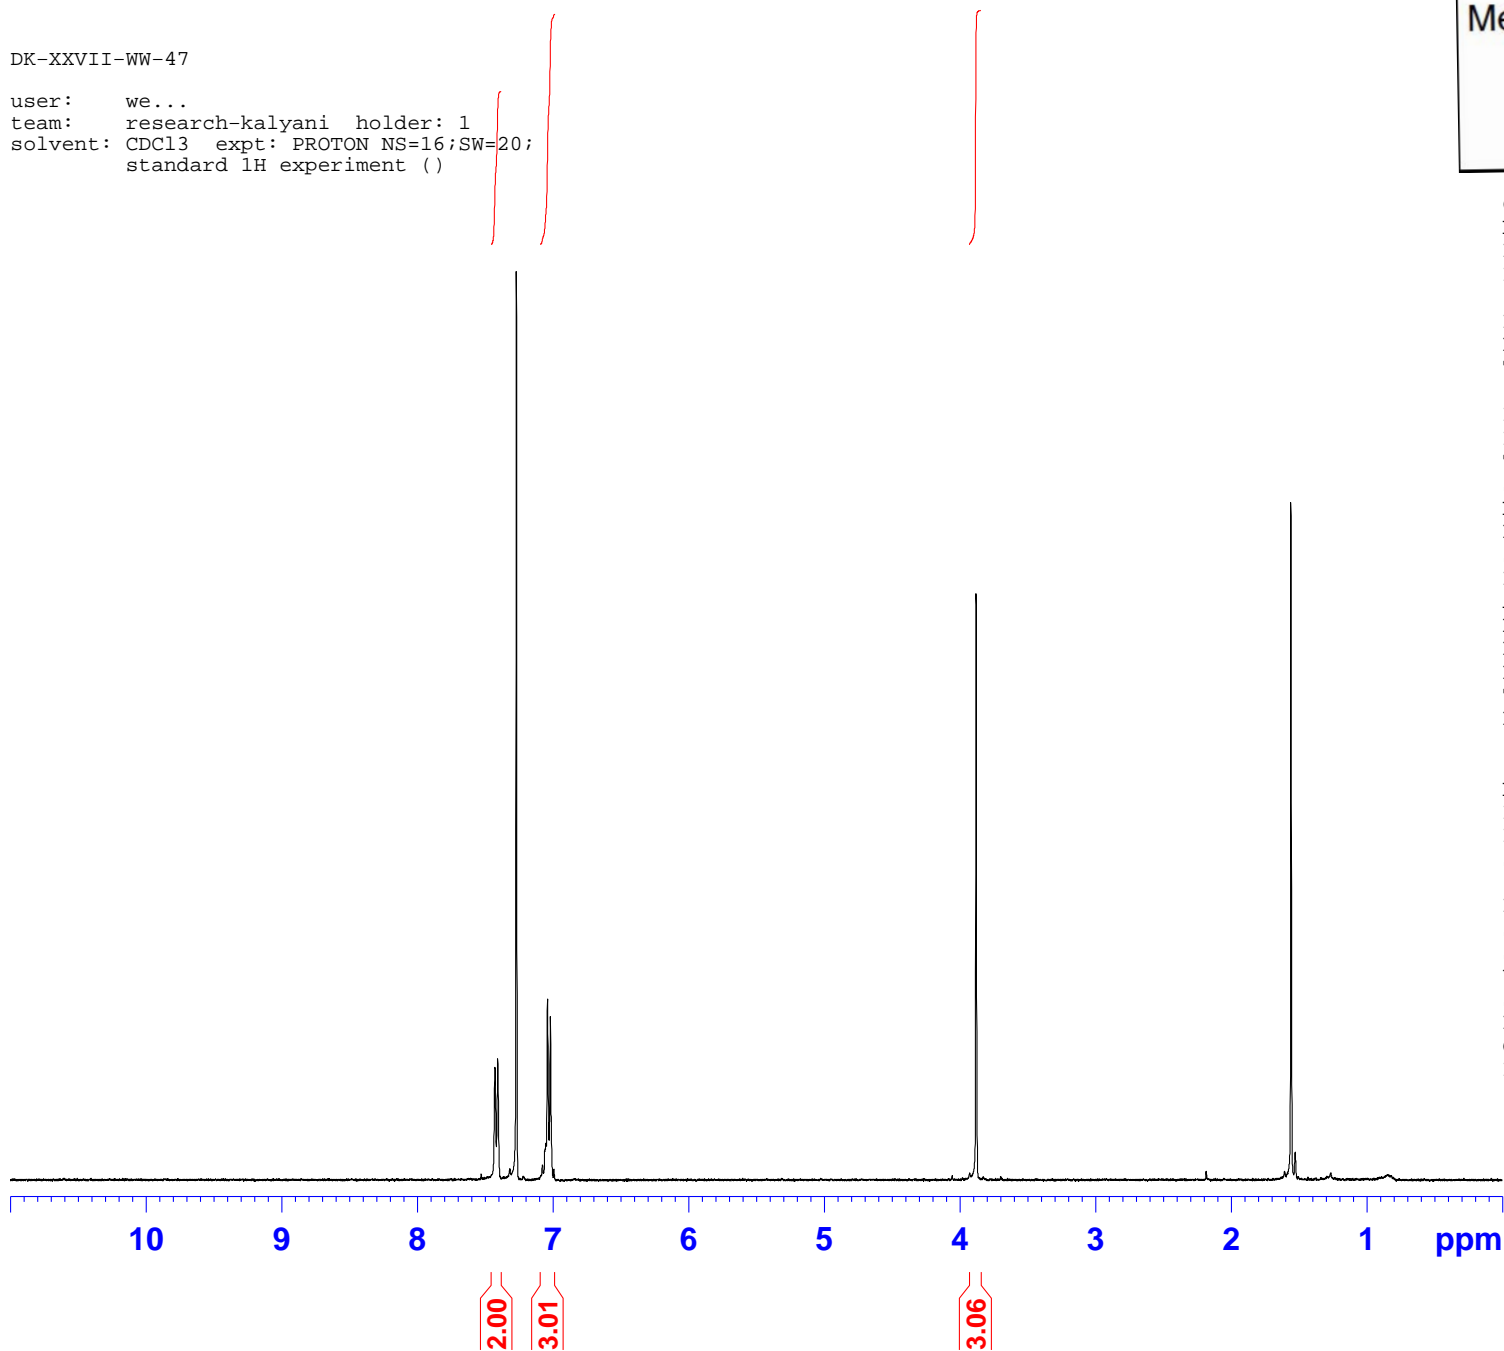

DK-XIX-LS-135 PURE

user: SC...  
team: research-kalyani-sardzins holder: 4  
solvent: CDCl3 expt: PROTON NS=16;SW=20;  
standard 1H experiment ()

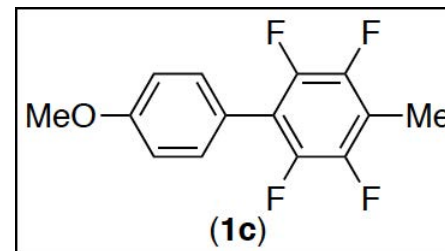

Current Data Parameters  
NAME Jul25-2014  
EXPNO 1903210  
PROCNO 1

F2 - Acquisition Parameters  
Date\_ 20140725  
Time 15.03  
INSTRUM spect  
PROBHD 5 mm BBO 1H/13  
PULPROG zg30  
TD 65536  
SOLVENT CDCl3  
NS 16  
DS 2  
SWH 8012.820 Hz  
FIDRES 0.122266 Hz  
AQ 4.0894966 sec  
RG 724.1  
DW 62.400 usec  
DE 6.00 usec  
TE 300.0 K  
D1 1.00000000 sec

==== CHANNEL f1 =====  
NUC1 1H  
P1 11.75 usec  
PL1 -4.00 dB  
SFO1 400.1324710 MHz

F2 - Processing parameters  
SI 32768  
SF 400.1300000 MHz  
WDW EM  
SSB 0  
LB 0.30 Hz  
GB 0  
PC 1.00

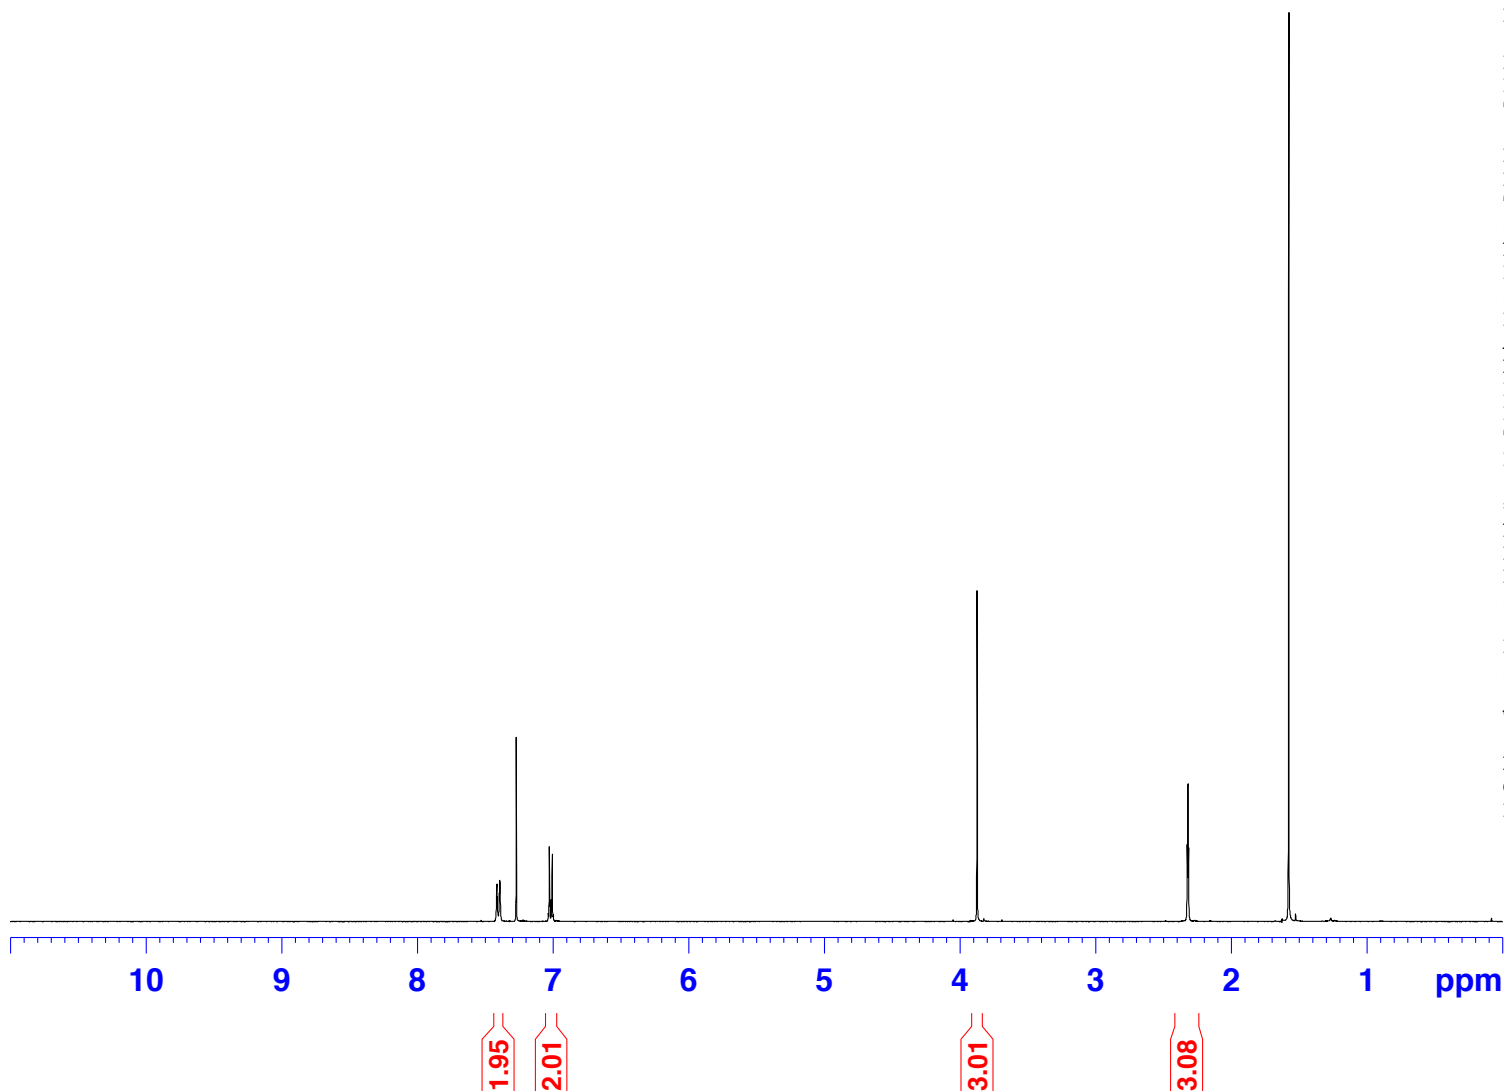

DK-XIX-LS-140-PURE?-FR36-45

user: sa...  
team: research-kalyani-sardzins holder: 2  
solvent: CDCl3 expt: PROTON NS=16;SW=20;  
standard 1H experiment ()

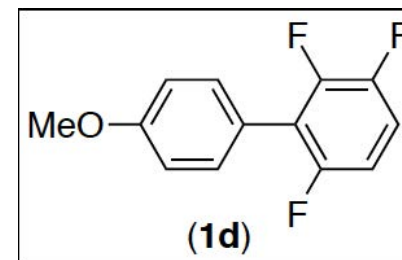

Current Data Parameters  
NAME Jul31-2014  
EXPNO 1911410  
PROCNO 1

F2 - Acquisition Parameters  
Date\_ 20140731  
Time 10.31  
INSTRUM spect  
PROBHD 5 mm BBO 1H/13  
PULPROG zg30  
TD 65536  
SOLVENT CDCl3  
NS 16  
DS 2  
SWH 8012.820 Hz  
FIDRES 0.122266 Hz  
AQ 4.0894966 sec  
RG 406.4  
DW 62.400 usec  
DE 6.00 usec  
TE 300.0 K  
D1 1.00000000 sec

==== CHANNEL f1 =====  
NUC1 1H  
P1 11.75 usec  
PL1 -4.00 dB  
SFO1 400.1324710 MHz

F2 - Processing parameters  
SI 32768  
SF 400.1300000 MHz  
WDW EM  
SSB 0  
LB 0.30 Hz  
GB 0  
PC 1.00

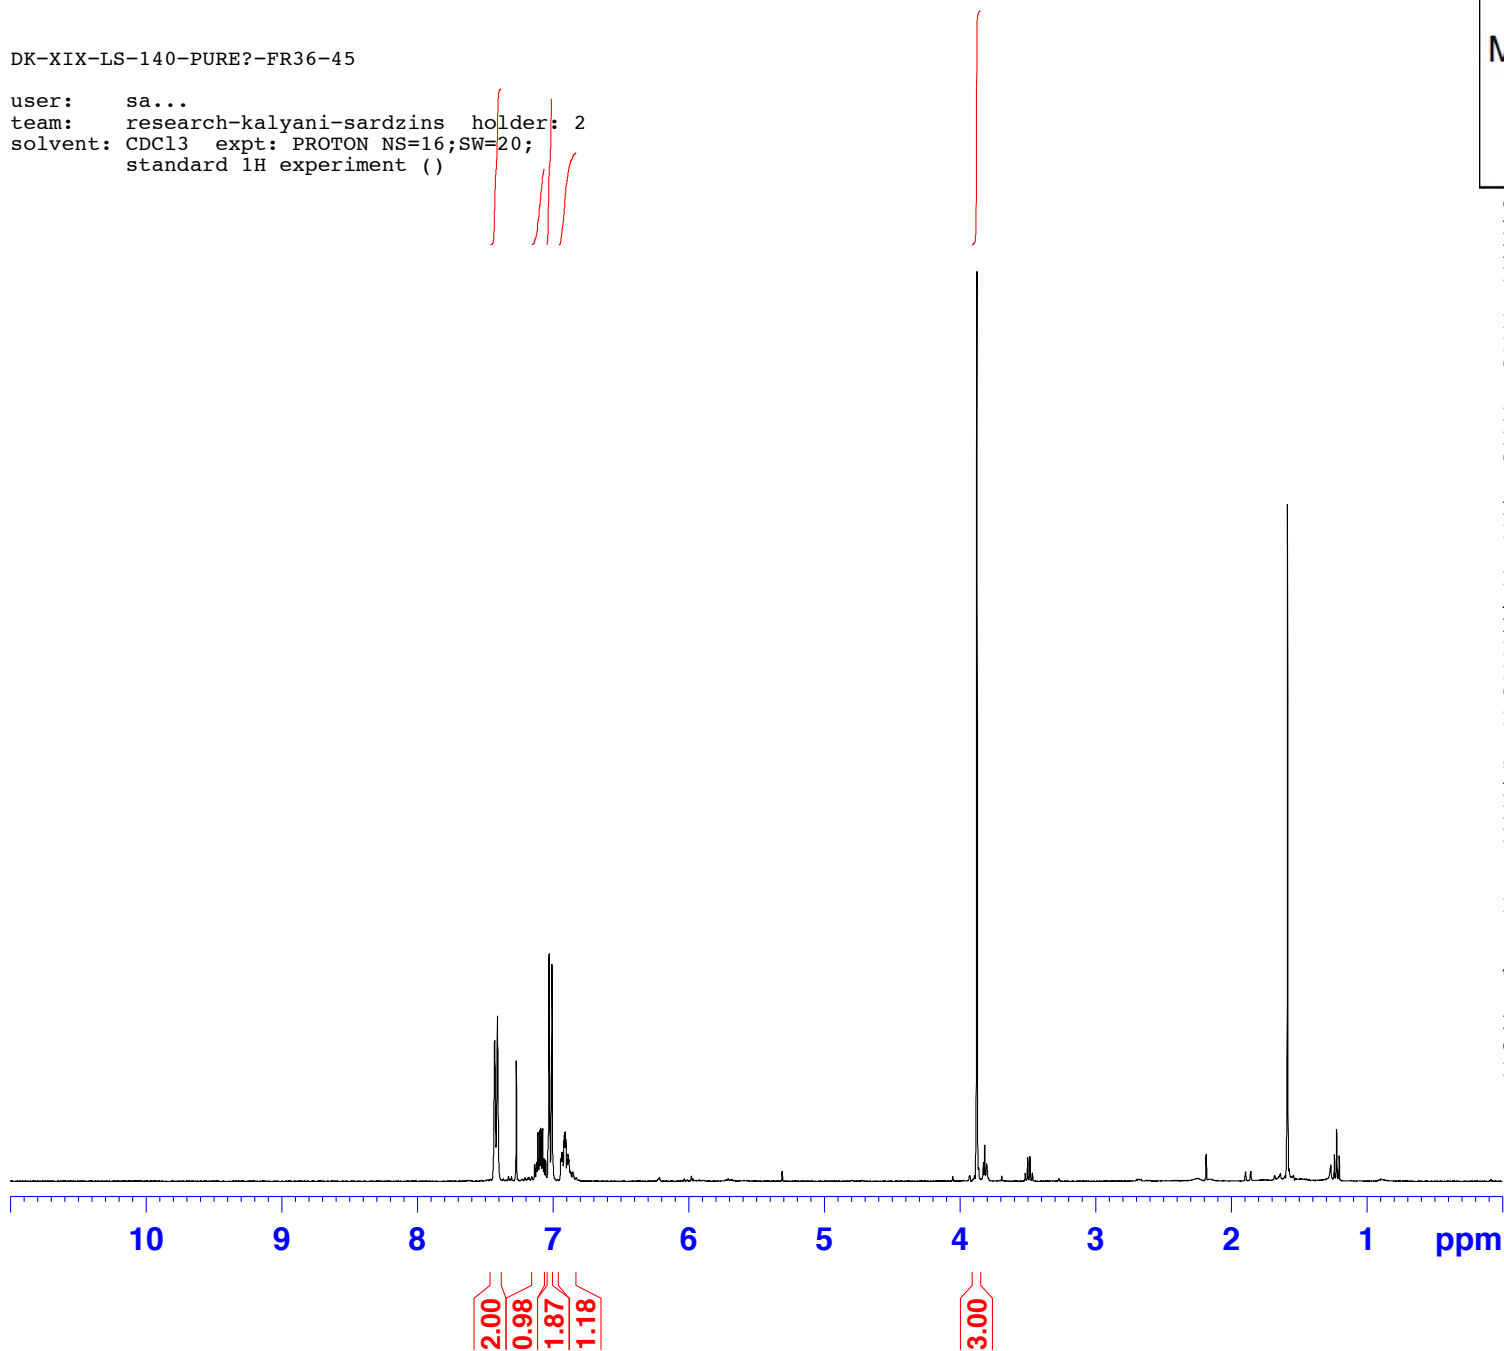



DK-XIX-LS-153-Repurified-FR24-51

user: sa...  
team: research-kalyani-sardzins holder: 8  
solvent: CDCl3 expt: PROTON NS=16;SW=20;  
standard 1H experiment ()

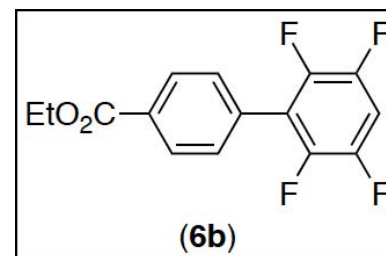

Current Data Parameters  
NAME Jul31-2014  
EXPNO 1914410  
PROCNO 1

F2 - Acquisition Parameters  
Date\_ 20140801  
Time 5.42  
INSTRUM spect  
PROBHD 5 mm BBO 1H/13  
PULPROG zg30  
TD 65536  
SOLVENT CDCl3  
NS 16  
DS 2  
SWH 8012.820 Hz  
FIDRES 0.122266 Hz  
AQ 4.0894966 sec  
RG 812.7  
DW 62.400 usec  
DE 6.00 usec  
TE 300.0 K  
D1 1.00000000 sec

==== CHANNEL f1 =====  
NUC1 1H  
P1 11.75 usec  
PL1 -4.00 dB  
SFO1 400.1324710 MHz

F2 - Processing parameters  
SI 32768  
SF 400.1300000 MHz  
WDW EM  
SSB 0  
LB 0.30 Hz  
GB 0  
PC 1.00

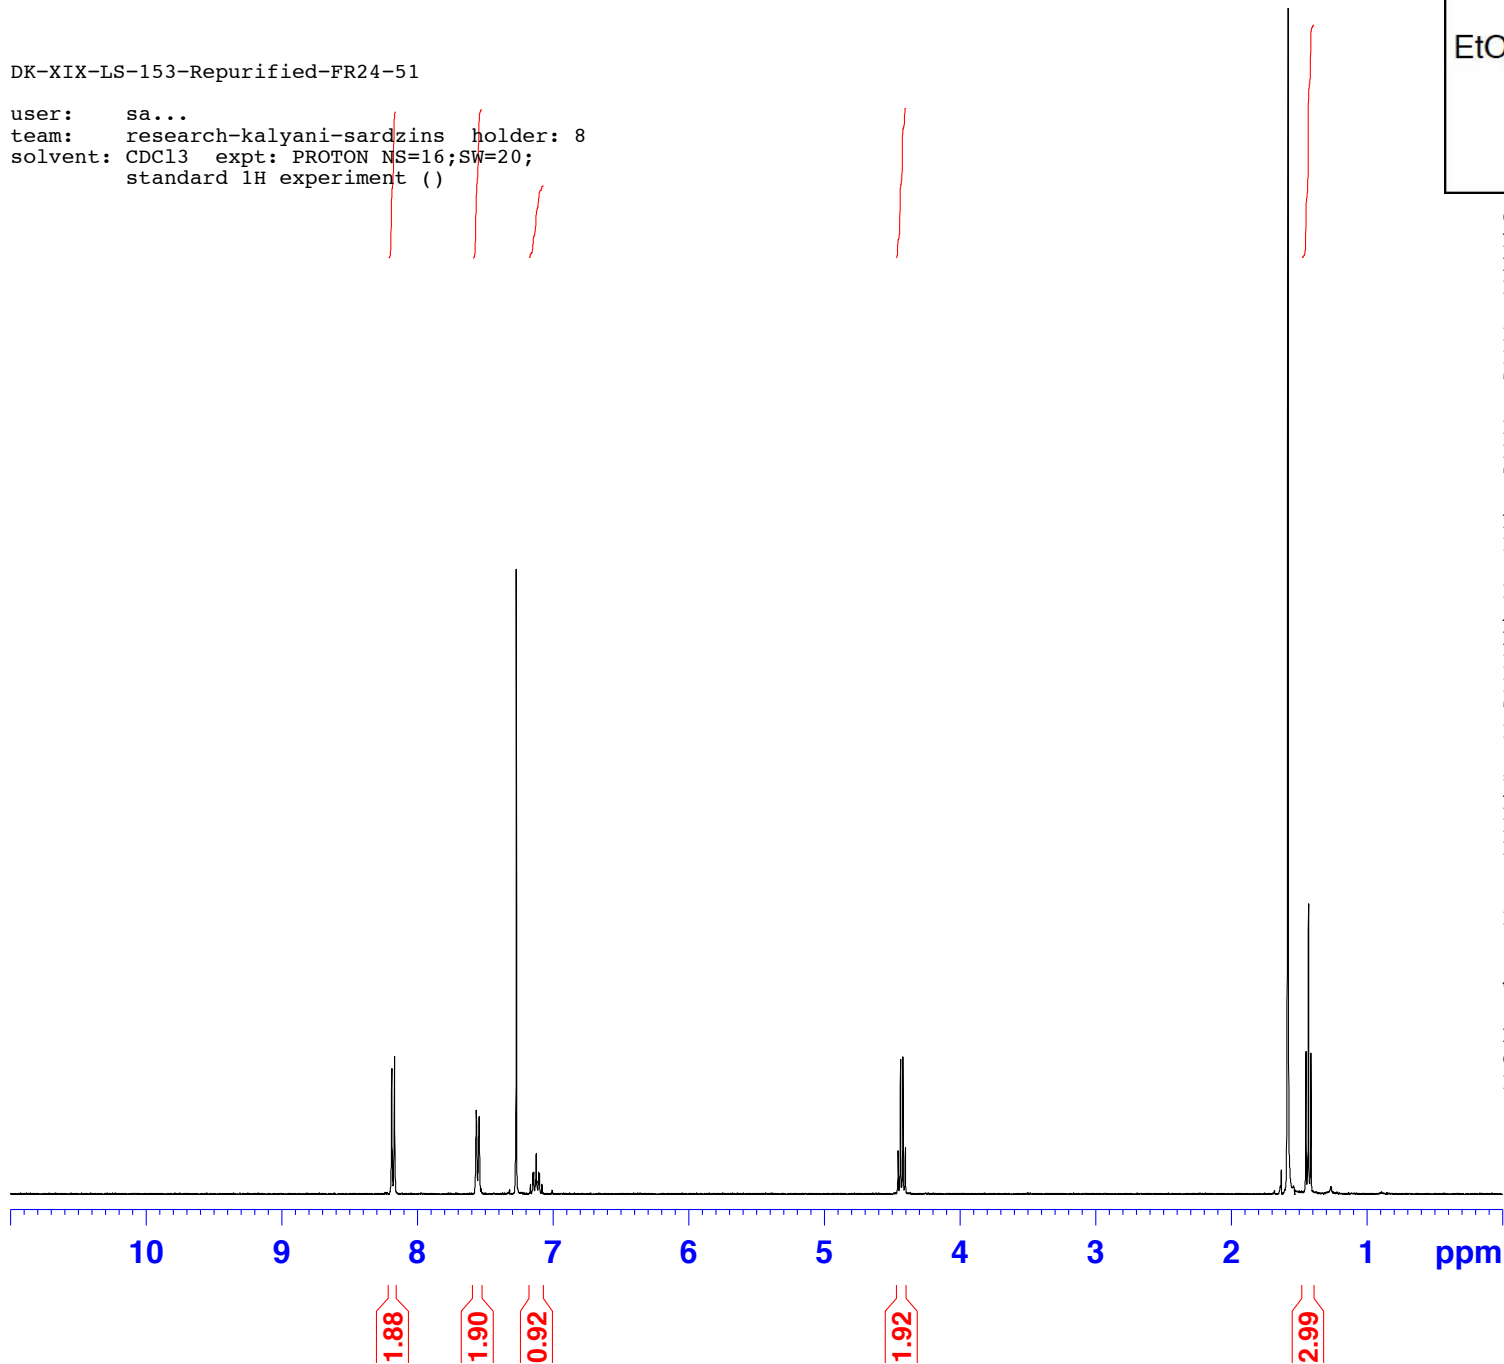

DK-XIX-LS-153-13C-FR24-51 PURE

user: sa...  
team: research-kalyani-sardzins holder: 4  
solvent: CDCl3 expt: C13CPD32 NS=8000;D1=2;  
standard C13 experiment ()

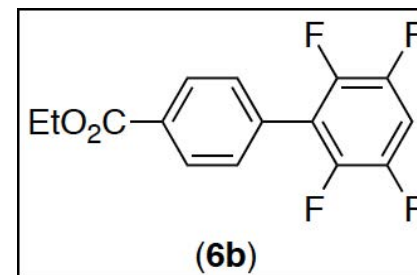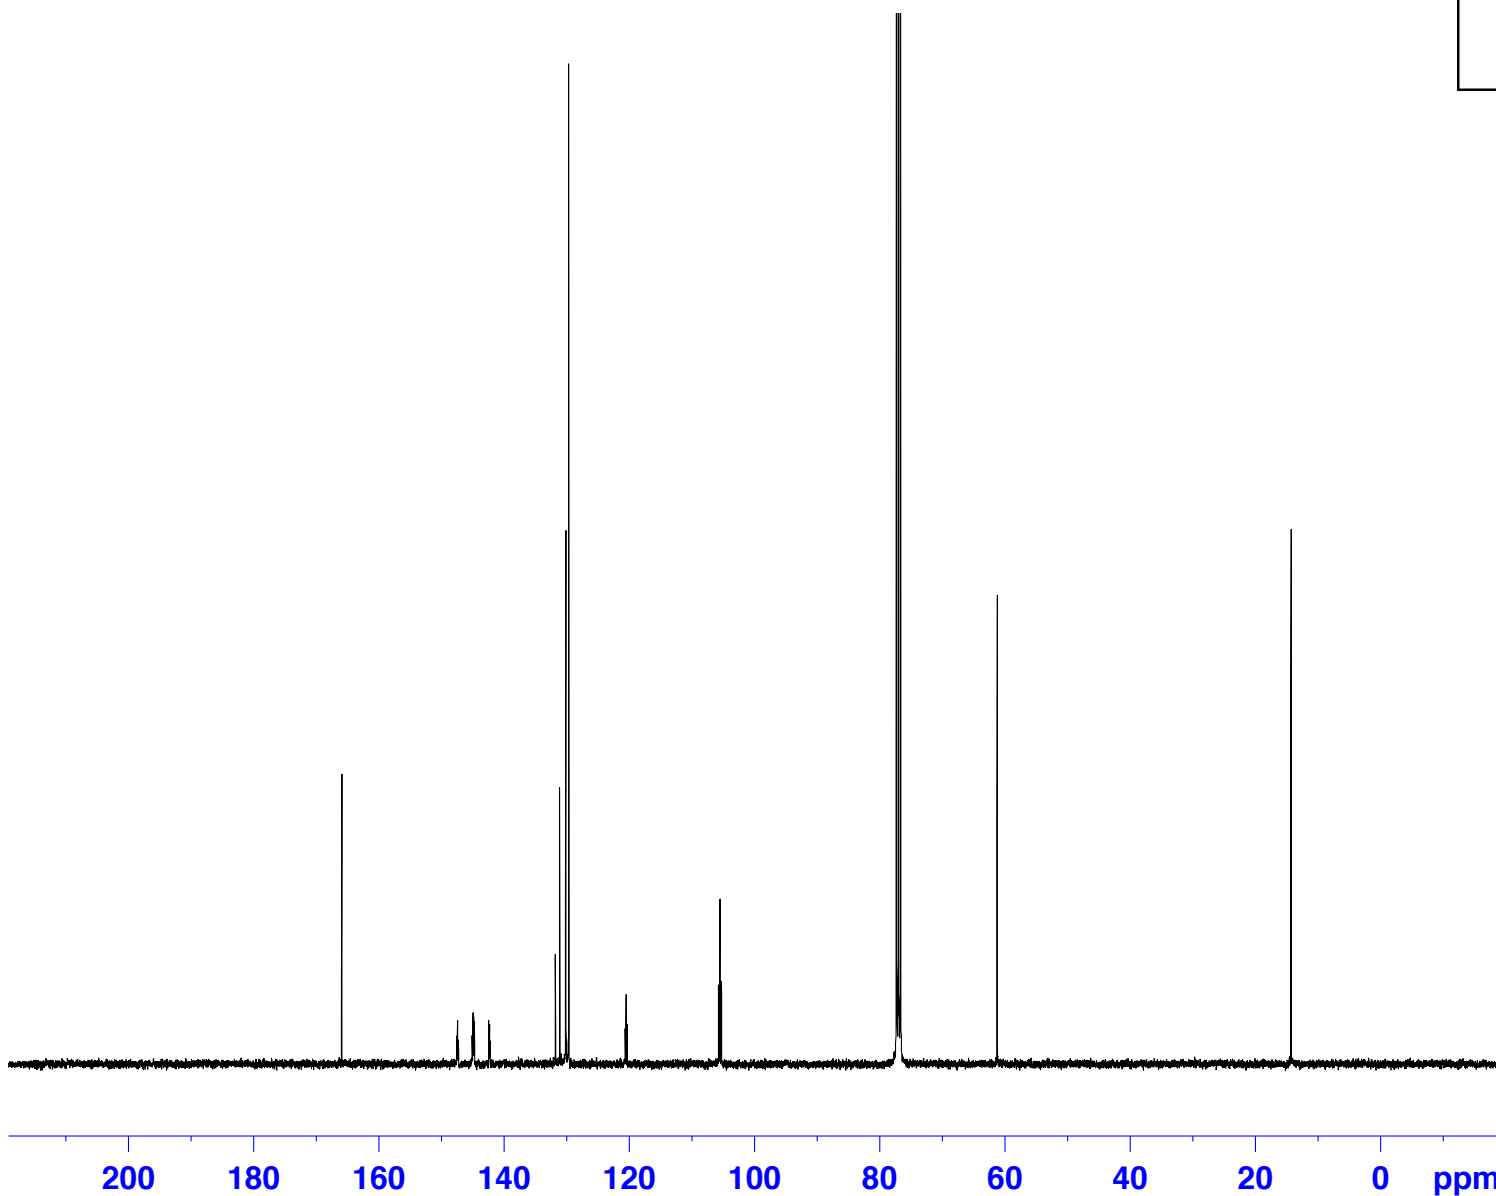

Current Data Parameters  
NAME Aug02-2014  
EXPNO 1914910  
PROCNO 1

F2 - Acquisition Parameters  
Date\_ 20140802  
Time 17.33  
INSTRUM spect  
PROBHD 5 mm BBO 1H/13  
PULPROG zgpg30  
TD 65536  
SOLVENT CDCl3  
NS 8000  
DS 2  
SWH 23980.814 Hz  
FIDRES 0.365918 Hz  
AQ 1.3664756 sec  
RG 2298.8  
DW 20.850 usec  
DE 6.00 usec  
TE 300.0 K  
D1 2.00000000 sec  
d11 0.03000000 sec  
d12 0.00002000 sec

==== CHANNEL f1 =====  
NUC1 13C  
P1 9.00 usec  
PL1 -4.50 dB  
SFO1 100.6228298 MHz

==== CHANNEL f2 =====  
CPDPRG2 waltz16  
NUC2 1H  
PCPD2 90.00 usec  
PL2 -4.00 dB  
PL12 13.68 dB  
PL13 17.24 dB  
SFO2 400.1316005 MHz

F2 - Processing parameters  
SI 32768  
SF 100.6127690 MHz  
WDW EM

DK-XXV-LS-14-REDRIED-PURE

user: sa...  
team: research-kalyani-sardzins holder: 3  
solvent: CDCl3 expt: PROTON NS=16;SW=20;  
standard 1H experiment ()

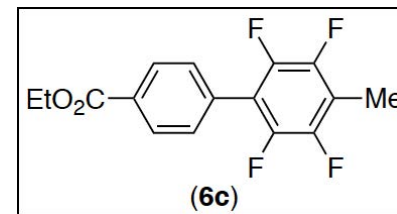

Current Data Parameters  
NAME Jul31-2014  
EXPNO 1912410  
PROCNO 1

F2 - Acquisition Parameters  
Date\_ 20140731  
Time 11.31  
INSTRUM spect  
PROBHD 5 mm BBO 1H/13  
PULPROG zg30  
TD 65536  
SOLVENT CDCl3  
NS 16  
DS 2  
SWH 8012.820 Hz  
FIDRES 0.122266 Hz  
AQ 4.0894966 sec  
RG 724.1  
DW 62.400 usec  
DE 6.00 usec  
TE 300.0 K  
D1 1.00000000 sec

==== CHANNEL f1 =====  
NUC1 1H  
P1 11.75 usec  
PL1 -4.00 dB  
SFO1 400.1324710 MHz

F2 - Processing parameters  
SI 32768  
SF 400.1300000 MHz  
WDW EM  
SSB 0  
LB 0.30 Hz  
GB 0  
PC 1.00

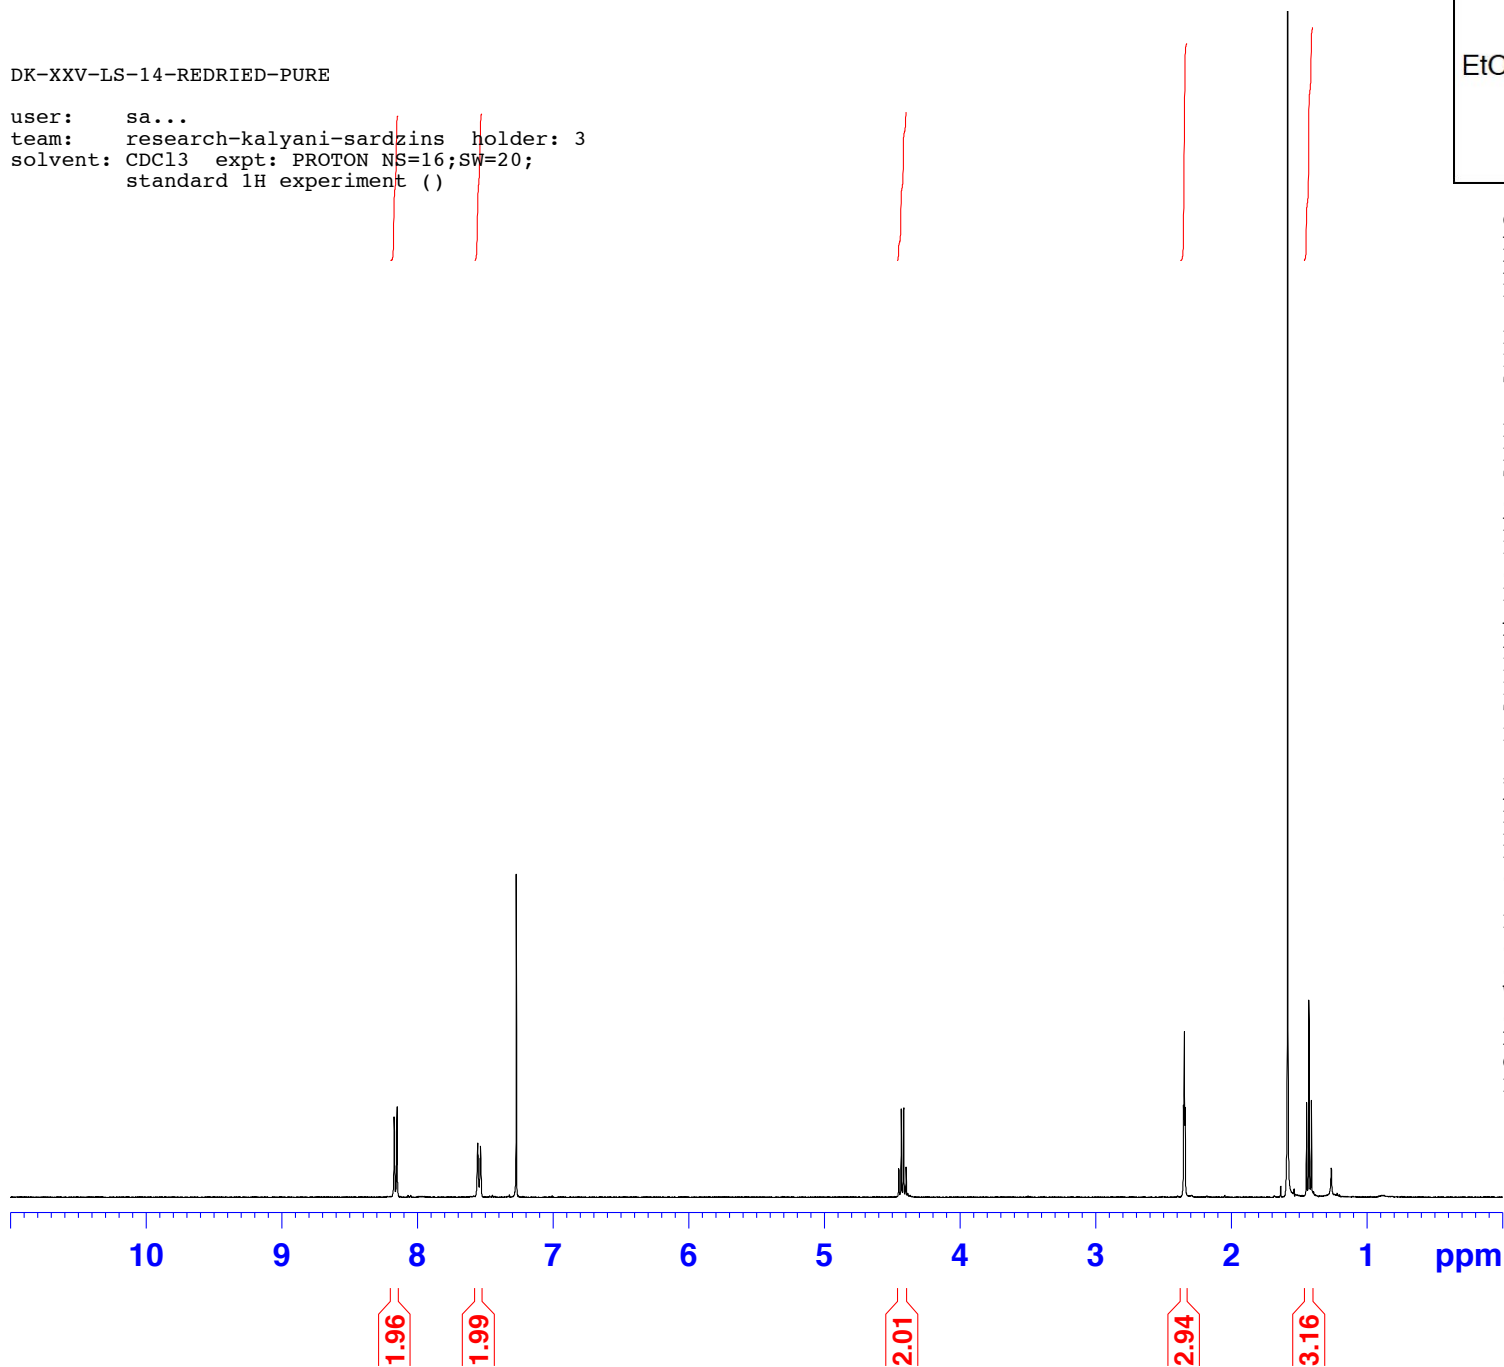

DK-XIX-LS-154-PureDry#2-FR27-50

user: sa...  
team: research-kalyani-sardzins holder: 12  
solvent: CDCl3 expt: PROTON NS=16;SW=20;  
standard 1H experiment ()

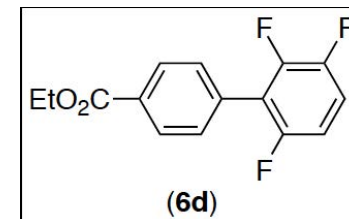

Current Data Parameters  
NAME Jul31-2014  
EXPNO 1912910  
PROCNO 1

F2 - Acquisition Parameters  
Date\_ 20140731  
Time 12.00  
INSTRUM spect  
PROBHD 5 mm BBO 1H/13  
PULPROG zg30  
TD 65536  
SOLVENT CDCl3  
NS 16  
DS 2  
SWH 8012.820 Hz  
FIDRES 0.122266 Hz  
AQ 4.0894966 sec  
RG 724.1  
DW 62.400 usec  
DE 6.00 usec  
TE 300.0 K  
D1 1.00000000 sec

==== CHANNEL f1 =====  
NUC1 1H  
P1 11.75 usec  
PL1 -4.00 dB  
SFO1 400.1324710 MHz

F2 - Processing parameters  
SI 32768  
SF 400.1300000 MHz  
WDW EM  
SSB 0  
LB 0.30 Hz  
GB 0  
PC 1.00

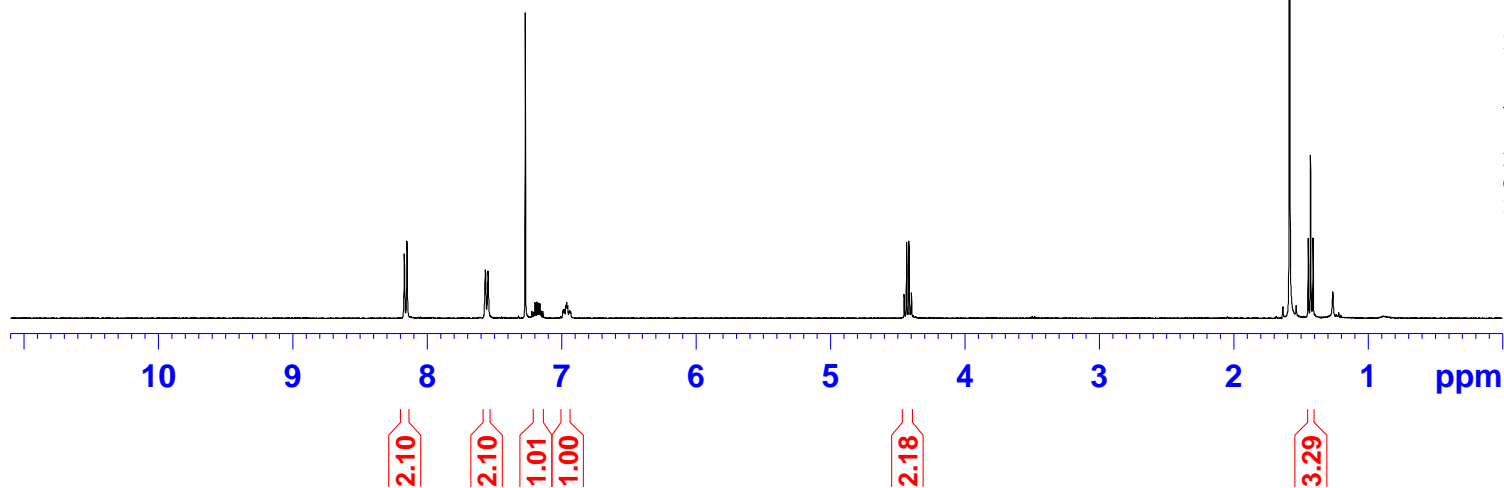

DK-XIX-LS-154-13C-PureDry#2-FR27-50

user: sa...  
team: research-kalyani-sardzins holder: 14  
solvent: CDCl3 expt: C13CPD32 NS=4096;D1=2;  
standard C13 experiment ()

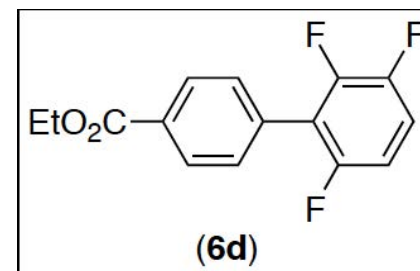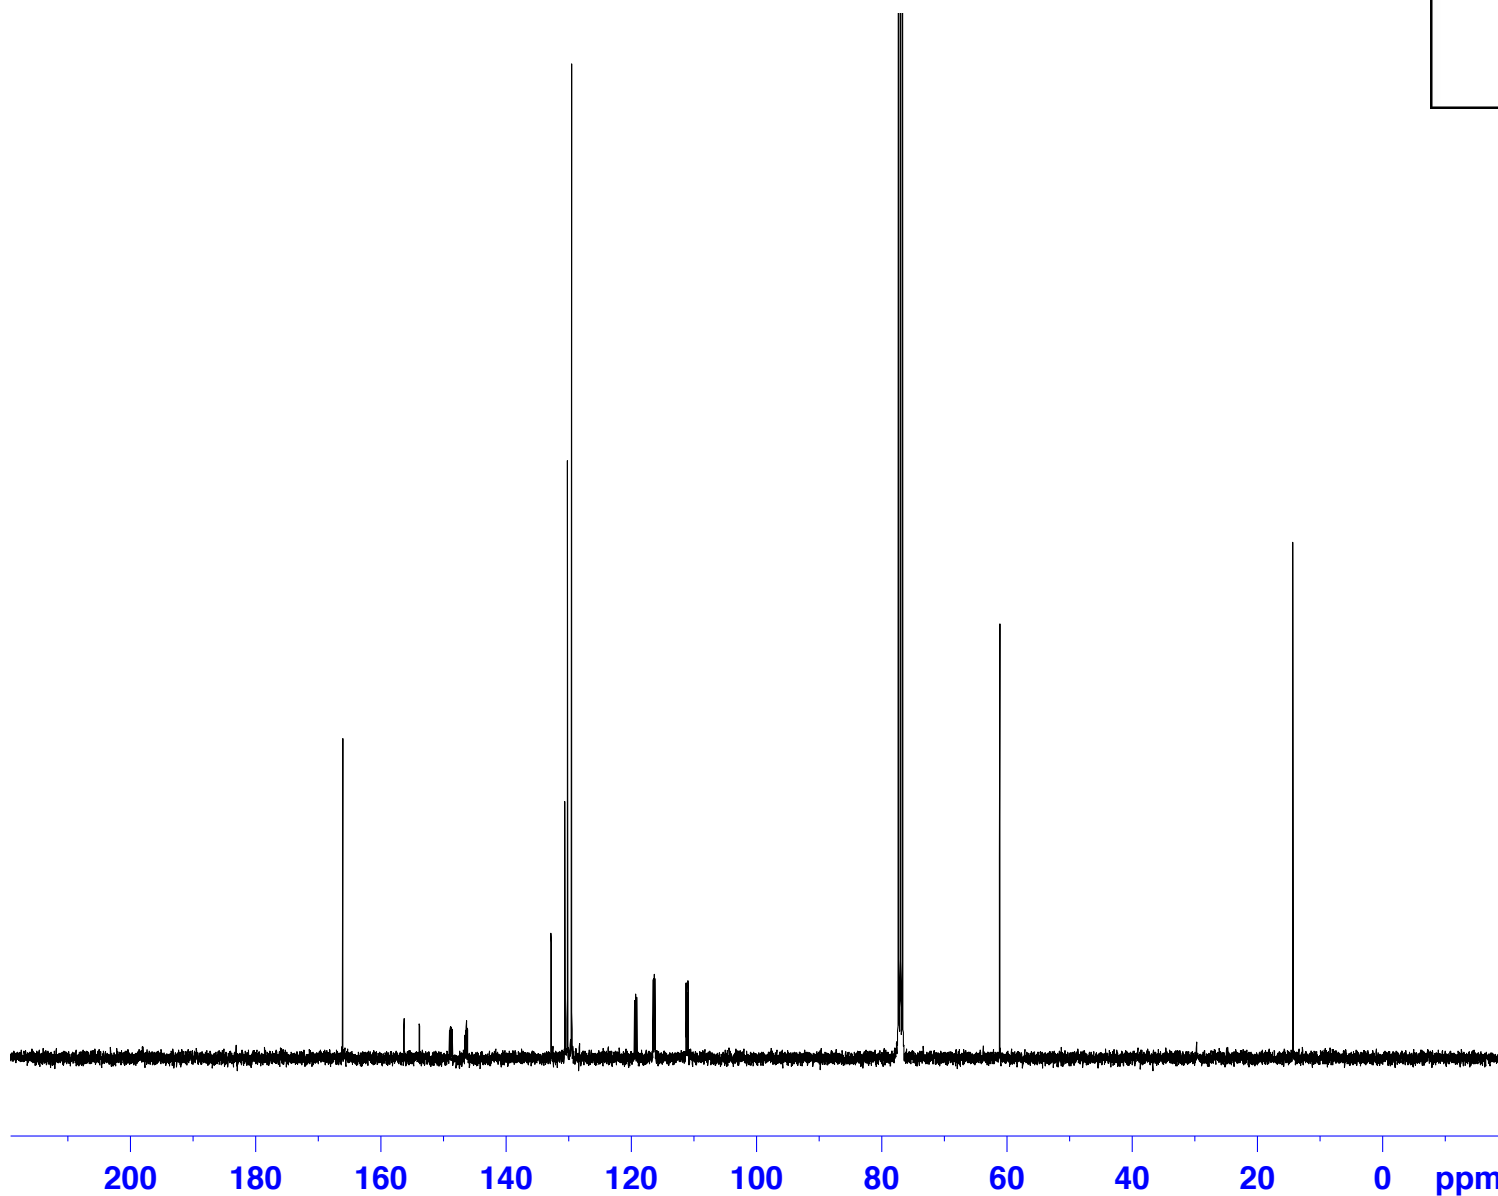

Current Data Parameters  
NAME Jul31-2014  
EXPNO 1913410  
PROCNO 1

F2 - Acquisition Parameters  
Date\_ 20140731  
Time 20.38  
INSTRUM spect  
PROBHD 5 mm BBO 1H/13  
PULPROG zgpg30  
TD 65536  
SOLVENT CDCl3  
NS 4096  
DS 2  
SWH 23980.814 Hz  
FIDRES 0.365918 Hz  
AQ 1.3664756 sec  
RG 4096  
DW 20.850 usec  
DE 6.00 usec  
TE 300.0 K  
D1 2.00000000 sec  
d11 0.03000000 sec  
d12 0.00002000 sec

==== CHANNEL f1 =====  
NUC1 13C  
P1 9.00 usec  
PL1 -4.50 dB  
SFO1 100.6228298 MHz

==== CHANNEL f2 =====  
CPDPRG2 waltz16  
NUC2 1H  
PCPD2 90.00 usec  
PL2 -4.00 dB  
PL12 13.68 dB  
PL13 17.24 dB  
SFO2 400.1316005 MHz

F2 - Processing parameters  
SI 32768  
SF 100.6127690 MHz  
WDW EM

DK-XXV-LS-39-PURE-#2CONC

user: sa...  
team: research-kalyani-sardzins holder: 15  
solvent: CDCl3 expt: PROTON NS=16;SW=20;  
standard 1H experiment ()

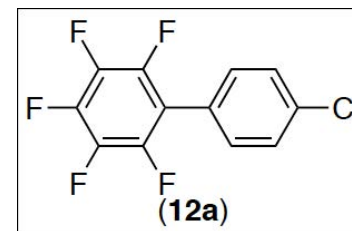

Current Data Parameters  
NAME Oct23-2014  
EXPNO 1958910  
PROCNO 1

F2 - Acquisition Parameters  
Date\_ 20141023  
Time 13.40  
INSTRUM spect  
PROBHD 5 mm BBO 1H/13  
PULPROG zg30  
TD 65536  
SOLVENT CDCl3  
NS 16  
DS 2  
SWH 8012.820 Hz  
FIDRES 0.122266 Hz  
AQ 4.0894966 sec  
RG 645.1  
DW 62.400 usec  
DE 6.00 usec  
TE 300.0 K  
D1 1.00000000 sec

==== CHANNEL f1 =====  
NUC1 1H  
P1 11.75 usec  
PL1 -4.00 dB  
SFO1 400.1324710 MHz

F2 - Processing parameters  
SI 32768  
SF 400.1300000 MHz  
WDW EM  
SSB 0  
LB 0.30 Hz  
GB 0  
PC 1.00

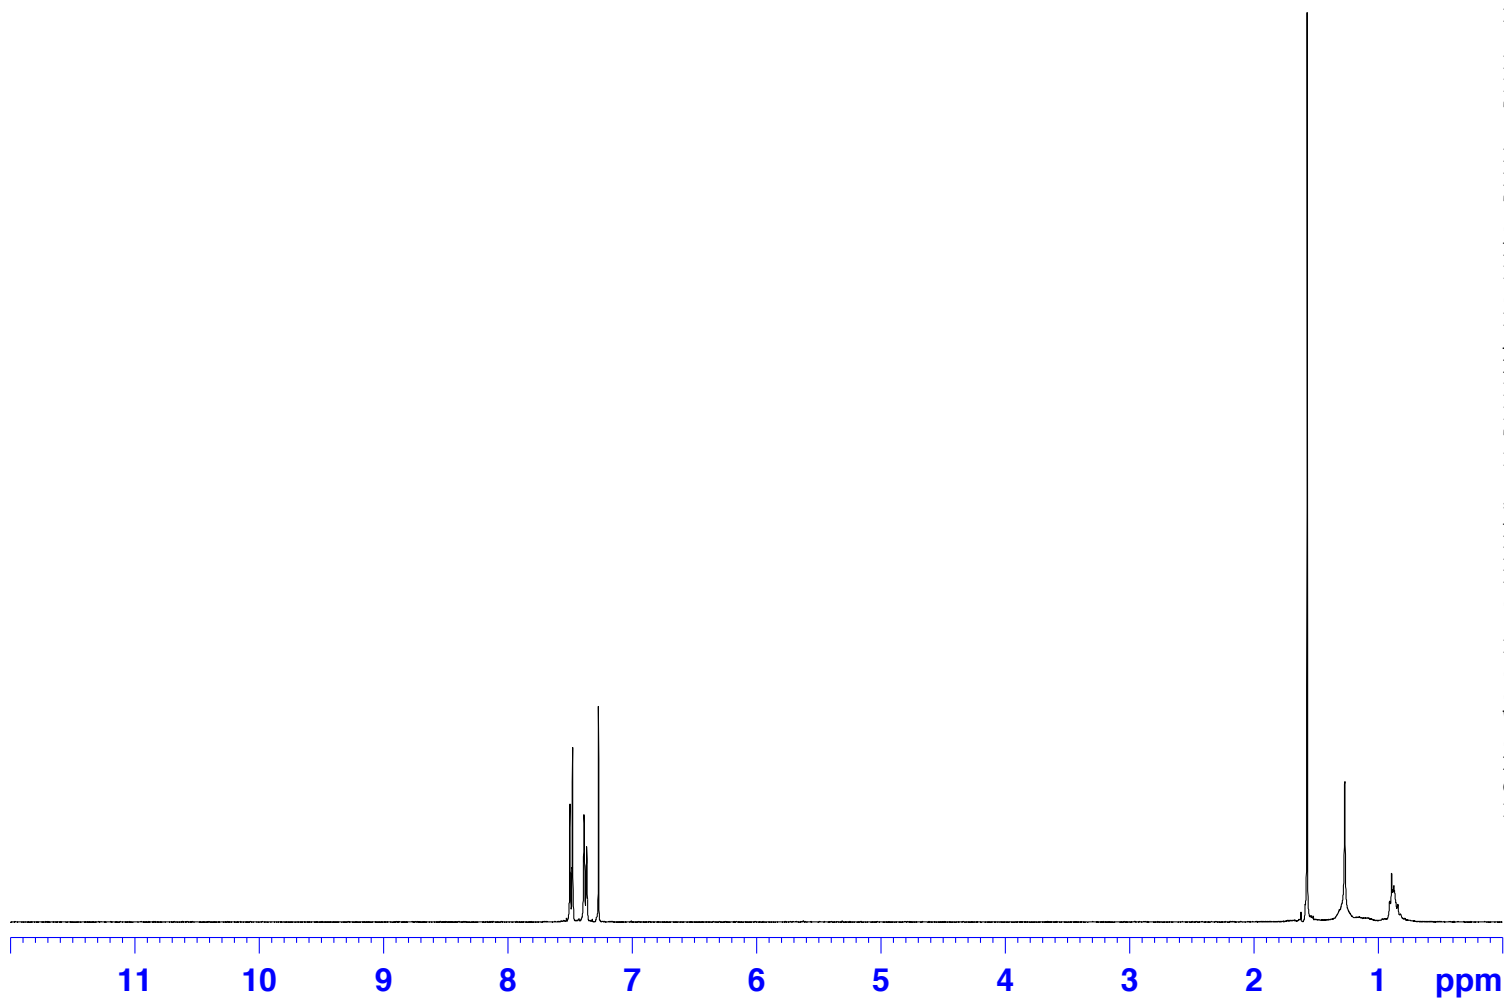

2.00  
2.00

DK-XXV-LS-41-T1

user: sa...  
team: research-kalyani-sardzins holder: 13  
solvent: CDCl3 expt: PROTON NS=16;SW=20;  
standard 1H experiment ()

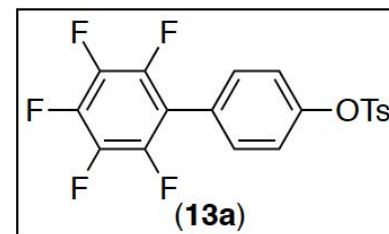

Current Data Parameters  
NAME Nov01-2014  
EXPNO 1969310  
PROCNO 1

F2 - Acquisition Parameters  
Date\_ 20141101  
Time 11.42  
INSTRUM spect  
PROBHD 5 mm BBO 1H/13  
PULPROG zg30  
TD 65536  
SOLVENT CDCl3  
NS 16  
DS 2  
SWH 8012.820 Hz  
FIDRES 0.122266 Hz  
AQ 4.0894966 sec  
RG 812.7  
DW 62.400 usec  
DE 6.00 usec  
TE 300.0 K  
D1 1.00000000 sec

==== CHANNEL f1 =====  
NUC1 1H  
P1 11.75 usec  
PL1 -4.00 dB  
SFO1 400.1324710 MHz

F2 - Processing parameters  
SI 32768  
SF 400.1300000 MHz  
WDW EM  
SSB 0  
LB 0.30 Hz  
GB 0  
PC 1.00

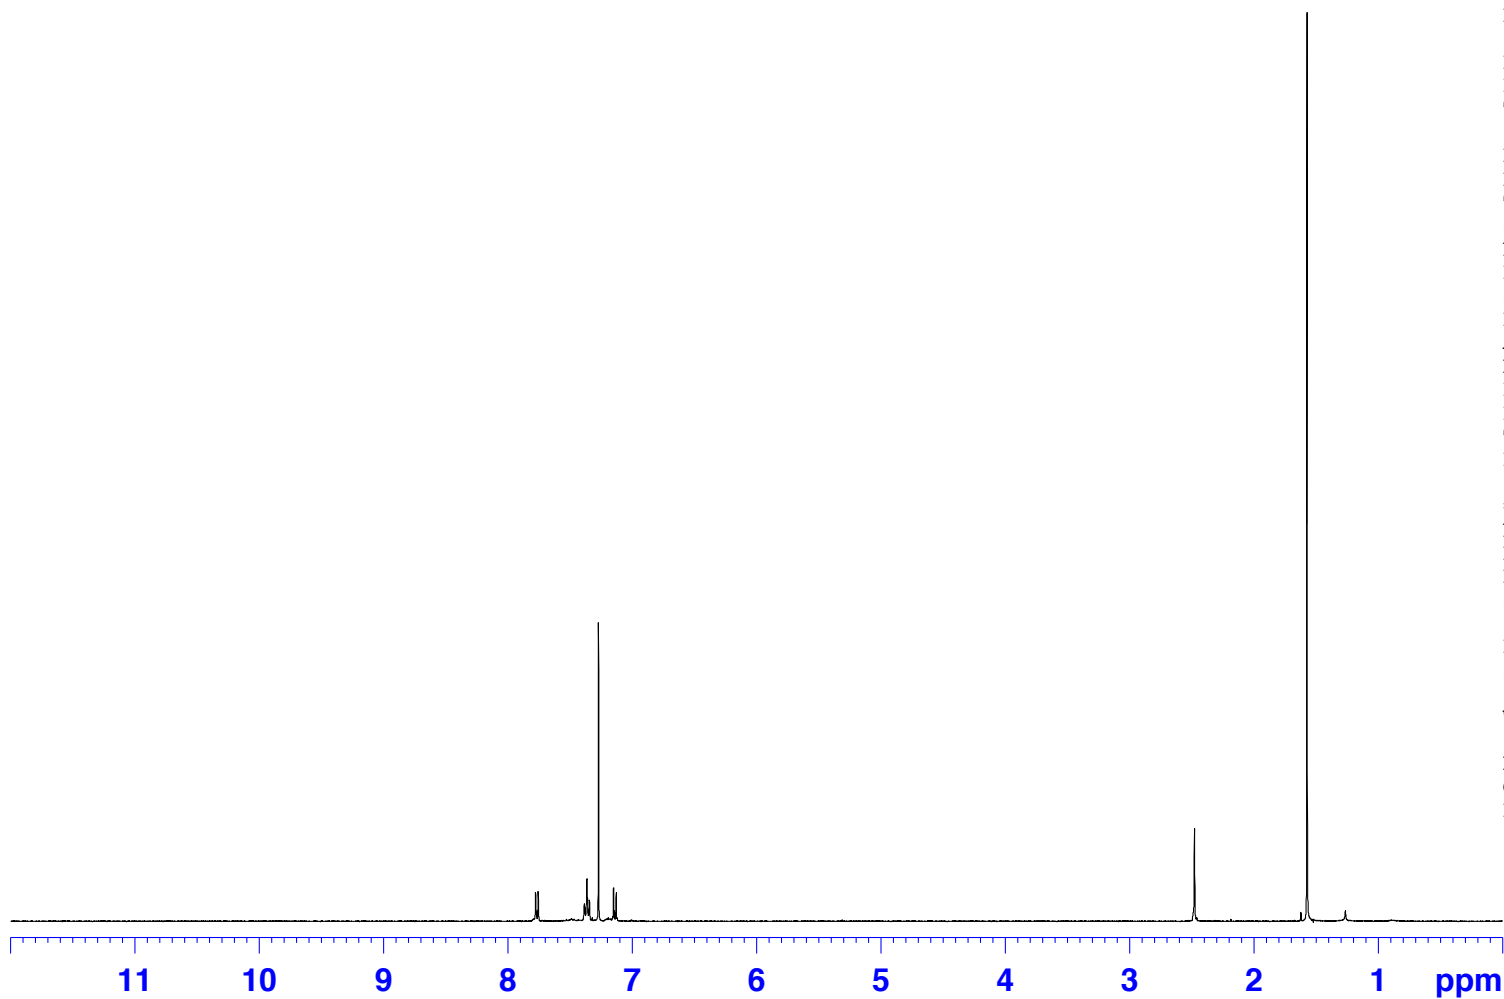

1.93  
3.66  
1.73

2.99
